1 **Early retinal deprivation crossmodally alters nascent subplate circuits**  
2 **and activity in the auditory cortex during the precritical period**

3 Didhiti Mukherjee,<sup>1\*</sup> Bingham Xue,<sup>2\*</sup> Chih-Ting Chen,<sup>1</sup> Minzi Chang,<sup>1</sup> Joseph P. Y. Kao<sup>3</sup> and  
4 Patrick O. Kanold<sup>1,2,4</sup>

5  
6 \* Contributed equally

7  
8 **Author affiliations:**

9 <sup>1</sup> Department of Biomedical Engineering, Johns Hopkins University, Baltimore, MD 21205

10 <sup>2</sup> Department of Biology University of Maryland, College Park, MD 20742

11 <sup>3</sup> Center for Biomedical Engineering and Technology, and Department of Physiology, University  
12 of Maryland School of Medicine, Baltimore, MD 21201

13 <sup>4</sup> Kavli Neuroscience Discovery Institute, Johns Hopkins University, Baltimore, MD 21205

14  
15 **Correspondence to:**

16 Patrick O. Kanold, Ph.D.

17 **Full address**

18 Department of Biomedical Engineering

19 Johns Hopkins University

20 379 Miller Research Building

21 Baltimore, MD 21205, USA

22 **E-mail:** [pkanold@jhu.edu](mailto:pkanold@jhu.edu)

23

24 **Running title:** Altered subplate circuits and auditory cortical activity after complete retinal  
25 deprivation in newborn mice.

26 **Keywords:** auditory cortex, crossmodal plasticity, precritical period, retinal deprivation, subplate  
27 neurons.

### 28 **Contributions**

29 POK and DM designed research. POK supervised research. DM performed surgery and in vivo  
30 imaging. DM and CC analyzed in vivo imaging data. BX and MC performed in vitro experiments.  
31 BX analyzed in vitro data. DM wrote the manuscript. DM, POK and JPYK edited the manuscript.  
32 JPYK contributed reagents.

### 33 **Funding**

34 This work was supported by NIH R01DC009607 (POK) and NIH R01GM056481 (JPYK).

### 35 **Competing interests**

36 The authors report no competing interests.

37

## 38 **Abstract**

39 Sensory perturbation in one modality results in adaptive reorganization of neural pathways within  
40 the spared modalities, a phenomenon known as “crossmodal plasticity”, which has been  
41 examined during or after the classic ‘critical period’. Because peripheral perturbations can alter  
42 auditory cortex (ACX) activity and functional connectivity of the ACX subplate neurons (SPNs)  
43 even before the classic critical period, called the precritical period, we investigated if retinal  
44 deprivation at birth crossmodally alters ACX activity and SPN circuits during the precritical period.

45 We deprived newborn mice of visual inputs after birth by performing bilateral enucleation.  
46 We performed in vivo imaging in the ACX of awake pups during the first two postnatal weeks to  
47 investigate cortical activity. We found that enucleation alters spontaneous and sound-evoked  
48 activity in the ACX in an age-dependent manner. Next, we performed whole-cell patch clamp  
49 recording combined with laser scanning photostimulation in ACX slices to investigate circuit  
50 changes in SPNs. We found that enucleation alters the intracortical inhibitory circuits impinging  
51 on SPNs shifting the excitation-inhibition balance towards excitation and this shift persists after  
52 ear opening. Together, our results indicate that crossmodal functional changes exist in the  
53 developing sensory cortices at early ages before the onset of the classic critical period.

## 54 **Introduction:**

55 *Neural plasticity* allows the brain to adapt to different contexts through rewiring and  
56 reorganization. The unpredictable nature of sensory experience prompts different forms of  
57 plasticity that enable adaptation to rapidly changing environments (Butz et al., 2009; Hensch &  
58 Stryker, 2004; Hubener & Bonhoeffer, 2014; Lorenz, 1935). Although plastic changes in the brain  
59 are observed throughout life (Ball & Sekuler, 1982; Sato & Stryker, 2008; Sawtell et al., 2003),  
60 they are particularly important during early developmental phases when robust sensory  
61 experience from the external environment substantially influences the structural and functional  
62 maturation of developing neural structures {for review see (Kolb & Gibb, 2011; Skaliora, 2002)},  
63 thereby making the developing brain extremely vulnerable to loss of environmental stimuli (i.e.,  
64 sensory deprivation).

65         Early sensory deprivation in any modality such as visual (Argandona & Lafuente, 1996),  
66 auditory (Kral & Eggermont, 2007), or somatosensory (Briner et al., 2010) results in extensive  
67 plastic changes within the respective sensory cortices (Argandona & Lafuente, 1996; Briner et al.,  
68 2010; Kral & Eggermont, 2007; Kral et al., 2005; Majewska & Sur, 2003; Raggio & Schreiner,  
69 1999), a phenomenon known as “intramodal cortical plasticity”. However, developmental cortical  
70 plasticity is not limited to “intramodal” changes. Although the time course for experience-driven  
71 sensory development is specific for each modality, sensory perturbations in one modality also  
72 result in adaptive reorganization of neural pathways within the spared modalities, including the  
73 spared sensory cortices. These adaptive rearrangements within the spared sensory cortices are  
74 known as “crossmodal compensatory cortical plasticity” (Bell et al., 2019; Larsen et al., 2009;  
75 Mezzera & Lopez-Bendito, 2016; Ramamurthy & Krubitzer, 2018; Striem-Amit et al., 2012;  
76 Teichert & Bolz, 2018).

77 Crossmodal compensatory plasticity within the undeprived sensory cortices, as observed  
78 in adults, is most striking when the sensory deprivation is performed very early in development  
79 and sustained through the classic “critical period” or is performed during the classic “critical  
80 period” [for review see (Bell et al., 2019; Mezzera & Lopez-Bendito, 2016; Teichert & Bolz, 2018)]  
81 — a brief developmental time window that commences after thalamic innervation of layer (L) 4  
82 neurons (Barkat et al., 2011; Erzurumlu & Gaspar, 2012) during which the nervous system is  
83 robustly shaped by environmental influence (Barkat et al., 2011; Erzurumlu & Gaspar, 2012;  
84 Hubel & Wiesel, 1970; Kreile et al., 2011). In altricial experimental animals like rats, cats, mice,  
85 ferrets, hamsters etc., eyelids and ear canals open postnatally (Chang & Kanold, 2021; Mezzera  
86 & Lopez-Bendito, 2016), and marks the onset of the “classic critical period” (Barkat et al., 2011;  
87 Espinosa & Stryker, 2012; Reh et al., 2020). The developmental time before the onset of the  
88 classic critical period, frequently termed the “precritical period” has been thought to be governed  
89 by genetic factors (Diao et al., 2018; Webber & Raz, 2006) and spontaneous activity (Blankenship  
90 & Feller, 2010; Blumberg et al., 2013; Martini et al., 2021; Wang & Bergles, 2015), but devoid of  
91 the effects of sensory experience.

92 Recent evidence, however, demonstrates that sensory deprivation within the same  
93 modality (intramodal) can alter cortical circuits and function before the onset of thalamic activation  
94 of L4 and the classic critical period (Meng et al., 2021; Mukherjee et al., 2021; Tan et al., 2021).  
95 For example, peripheral insult during the precritical period intramodally alters circuit connectivity  
96 of the earlier born subplate neurons (SPNs) (Meng et al., 2021; Mukherjee et al., 2021). SPNs  
97 are the first targets of thalamocortical inputs before they innervate L4 neurons at the onset of the  
98 critical period (Barkat et al., 2011; Friauf et al., 1990; Friauf & Shatz, 1991; Herrmann et al., 1994;  
99 Higashi et al., 2002; Molnar et al., 2003; Mukherjee & Kanold, 2022; Zhao et al., 2009). They are  
100 essential for the development of thalamocortical and corticocortical connections as well as  
101 patterning of the ocular dominance columns and barrels (Ghosh et al., 1990; Ghosh & Shatz,

102 1992, 1993; Kanold et al., 2003; Kanold & Luhmann, 2010; Kanold & Shatz, 2006; Molnar et al.,  
103 2020; Tolner et al., 2012). Peripheral perturbations can alter SPN connections and result in  
104 neurodevelopmental disorders (Nagode et al., 2017; Nicolini & Fahnestock, 2018; Sheikh et al.,  
105 2019). SPNs in the ACX not only respond to peripheral sound stimulation before L4 neurons are  
106 responsive (Wess et al., 2017), but peripheral sound deprivation from birth alters intracortical SPN  
107 connectivity in the ACX during the precritical period (Meng et al., 2021; Mukherjee et al., 2021).  
108 Moreover, these intramodal changes in SPN circuitry are reflected in altered spontaneous and  
109 sound-evoked activity in the infant ACX during this early developmental period. (Meng et al., 2021;  
110 Mukherjee et al., 2021).

111 The developing ACX does not exclusively receive intramodal inputs. Instead, it receives  
112 crossmodal inputs from sensory cortices and subcortical structures of other modalities, including  
113 structures in the visual pathway (Hanganu-Opatz et al., 2015; Henschke et al., 2018; Kayser &  
114 Logothetis, 2007). For example, crossmodal projections from visual thalamus and primary and  
115 secondary visual cortices to the ACX are present in neonatal gerbils (Henschke et al., 2018). This  
116 raises the questions of whether the developing ACX is vulnerable to a broad range of sensory  
117 manipulation, including manipulations of visual function, and if such crossmodal manipulation  
118 alters ACX SPN circuits and ACX function before the critical period.

119 We thus deprived animals of all visual experience and examined the effect on ACX  
120 function and ACX SPN circuits. To ensure complete retinal deprivation (spontaneous and light-  
121 evoked), we performed bilateral enucleation in newborn mouse pups on postnatal day (P) 1 or 2.  
122 To examine ACX function we performed in vivo widefield imaging to record spontaneous and  
123 sound-evoked activity in the ACX. To examine ACX SPN circuits we performed whole-cell patch  
124 clamp recording from SPNs in thalamocortical slices combined with in vitro laser scanning  
125 photostimulation (LSPS). We performed both sets of experiments at P8-9 (before ear opening,  
126 precritical period) and P12-15 (around ear opening, onset of critical period). These two ages

127 allowed us to compare the early developmental trajectory of crossmodal changes within the ACX,  
128 without retinal input from birth.

129 We found that complete retinal deprivation at birth results in an increase in spontaneous  
130 ACX activity within the first and second postnatal week. Specifically, spontaneous events that are  
131 likely of central origin were larger and more frequent after birth enucleation. Similarly, sound-  
132 evoked central events were enhanced at both ages, whereas peripheral events remained  
133 unchanged. Concurrently, LSPS showed a transient reduction in inhibitory intracortical input to  
134 the SPNs at the end of the first postnatal week, which resulted in an imbalance between the  
135 excitatory and inhibitory inputs. To our knowledge, this is the first demonstration of functional  
136 crossmodal compensatory changes in mammalian sensory cortices before the onset of the classic  
137 critical period-

138

## 139 **Materials & Methods:**

### 140 **Animals**

141 All procedures were approved by the Institutional Animal Care and Use Committee (IACUC) at  
142 Johns Hopkins University, Baltimore, Maryland, USA. Experiments were performed on C57Bl/6J  
143 (JAX strain no. 000664) and Thy1-GCamP6s (JAX strain no. 024275) mouse pups of both sexes  
144 aged between P8-P16. Pups were raised with their mothers in standard laboratory cages in a 12-  
145 h light/12-h dark condition in the institutional animal colony where lights were turned on at 11:00  
146 am. Food and water were provided *ad libitum*.

### 147 **Newborn Bilateral Enucleation**

148 Bilateral enucleation surgeries were performed on C57Bl/6J and Thy1-GCamp6s mouse pups on  
149 P1-2 using previously published methods (Deng et al., 2021; Dye et al., 2012). In short, pups  
150 were briefly anesthetized with 1-2% inhaled isoflurane (Fluriso, VetOne, Boise, ID). The eyelids  
151 were opened with a surgical scalpel blade. The eyeballs were lifted away from the orbit with fine  
152 forceps and freed from the optic nerve and surrounding musculature. Following eye removal,  
153 eyelids were closed and sealed with surgical glue (Vetbond, 3M, Maplewood, MN). Pups were  
154 placed in a plastic box in a warm water bath maintained at 37°C for ~1 h for recovery before  
155 returning to their mothers. Sham surgery was performed as control in a cohort of pups at the same  
156 age where pups were subjected to anesthesia and revival procedures as described above. All  
157 pups were housed with their mothers until they were used for experiments at P8-9 or P12-15 and  
158 were weighed routinely to ensure normal thriving.

### 159 **In vivo wide field imaging**

160 In vivo wide field imaging was performed following previously published methods (Meng et al.,  
161 2021; Mukherjee et al., 2021) on unanesthetized Thy1-GCaMP6s pups at P8-9 (enucleation:  $n=9$ ,  
162 sham:  $n=8$ ) and P12-15 (enucleation:  $n=9$ ; sham:  $n=8$ ) after bilateral enucleation or sham surgery  
163 on P1-2 (Deng et al., 2021).

### 164 Surgery

165 All surgeries were acute, and pups were imaged on the same day. The pup was separated from  
166 the litter and was initially anesthetized with 4% inhaled isoflurane (Fluriso, VetOne, Boise, ID).  
167 For maintenance, isoflurane concentration was reduced to 2-3%. Throughout surgery, the pup  
168 was placed on a heating pad and the body temperature was kept at ~37°C. Depth of anesthesia  
169 was monitored every few minutes by observing respiratory pattern and tail-pinch reflex.

170 The scalp hair was trimmed and the skull overlying the left auditory cortex (ACX) was  
171 exposed. Connective tissues were gently removed with the help of a cotton-tipped applicator.



172 Next, a 3D-printed stainless steel headplate (Shapeways, NY) was attached with cyanoacrylate  
173 glue on the exposed skull. The headplate was secured to the skull by applying dental cement (C  
174 & B Metabond) on the outer perimeter of the headplate. The intact skull was cleaned by topical  
175 application of 10% collagenase solution followed by 80% glycerol (Zhao et al., 2018). The pup  
176 was lightly wrapped in gauze and placed in a plastic box in a warm water bath maintained at 37°C  
177 for ~30 min for recovery.

### 178 Wide field imaging

179 After recovery the pup was placed on a far-infrared heating pad (Kent Scientific) over a flat  
180 platform, head-fixed and transferred to a sound-proof recording chamber for imaging. In vivo  
181 imaging was performed through the intact and cleared skull (Zhao et al., 2018) according to our  
182 previously published methods (Francis et al., 2018; Meng et al., 2021; Mukherjee et al., 2021). In  
183 brief, blue LED light (470 nm CWL, Thorlabs) was used to excite GCaMP6s fluorescence and  
184 emitted light was collected using a tandem lens combination setup. Images were captured with  
185 Thorcam software (Thorlabs), which controls a Thorlabs DCC3240M CMOS camera. First, an  
186 image of the surface vasculature was captured. Next, the focal plane was advanced to a depth of  
187 ~200-400  $\mu\text{m}$  below the surface, where the rest of wide-field imaging was performed across all  
188 layers at a rate of 4 frames/sec, with a frame size of 640 $\times$ 512 pixels and a 100-ms exposure time.

189 Spontaneous activity of the cortex was first recorded for 10 minutes during which no  
190 sound was played. Thereafter, we acquired sound-evoked cortical activity. Pure tones of  
191 frequencies 4, 8, 16 and 32 kHz were generated using custom software in MATLAB and played  
192 from a free field speaker at an intensity of 80 dB sound pressure level (SPL). Each frequency was  
193 randomly repeated 12-13 times with an inter-trial interval of 30 s. Each trial consisted of 3-s pre-  
194 stimulus silence, 1-s tone presentation, and 5-s post-stimulus silence.

195           If the pup exhibited any signs of distress, the experiment was immediately terminated. The  
196 pup was euthanized at the end of the experiment.

### 197 Data analysis

198 Imaging data was analyzed using custom-written scripts in MATLAB (MathWorks) and as  
199 described previously (Meng et al., 2021; Mukherjee et al., 2021). Dimensionality reduction  
200 technique was used to perform automatic image segmentation so that pixels with strong temporal  
201 correlations across the image were grouped together into single components. We used an  
202 autoencoder neural network to perform the dimensionality reduction (Ji Liu et al., 2019). For each  
203 region of interest (ROI) we calculated the amplitude and frequency of spontaneous events and  
204 the amplitude of events after sound presentation.

205           For each trial, the response amplitude ( $\Delta F/F$ ) as a function of time for each ROI was  
206 defined as  $\Delta F/F = (F - F_0)/F_0$ , where  $F_0$  corresponds to the baseline fluorescence (defined  
207 quantitatively below) and  $F$  is the time-varying fluorescence intensity in the ROI. For spontaneous  
208 trials  $F_0$  was calculated by finding the first percentile of fluorescence intensity in sliding windows,  
209 the centers of which were equally spaced across the whole trial (window size = 300 frames) and  
210 using linear interpolation methods (MATLAB built-in function `regress`) across all windows. For  
211 sound-evoked responses,  $F_0$  was the first percentile of fluorescence within a 3-s window before  
212 tone onset.

213           For each ROI the averaged  $\Delta F/F$  was calculated within a 3-s window before and a 3-s  
214 window after tone onset for each trial and evaluated with paired-sample t-test comparison  
215 between the two averaged  $\Delta F/F$  across all repeats for each frequency. ROIs that showed a  
216 significant increase ( $p < 0.05$ ) in fluorescence after sound presentation at least for one frequency  
217 were designated as “responding ROIs”. Responding ROIs are plotted in pseudo-color for ease of  
218 visualization.

219 From the fluorescence traces of each ROI we identified high (H) and low (L)-  
220 synchronization events that are distinguished by size in the visual cortex (Siegel et al., 2012) and  
221 represent central and peripheral sources respectively (Meng et al., 2021; Siegel et al., 2012).  
222 Using the built-in peak detection function (findpeaks) in MATLAB with minimum peak prominence  
223 of 0.1 and minimum peak distance of 1 frame we first identified peaks in the fluorescence  
224 responses. Next, we used a threshold of 50%  $\Delta F/F$  to separate L- and H-events. Varying the  
225 threshold by  $\pm 10\%$  did not affect our results. The response amplitudes of L-/H-events across all  
226 the repeats over spontaneous trials or in a period of 3 s after tone onset for each ROI were  
227 compared between populations with rank sum test based on Lilliefors test for normality.

## 228 **In vitro electrophysiology**

229 In vitro recordings from brain slices were performed as previously described (Cruikshank et al.,  
230 2002; Meng et al., 2014; Zhao et al., 2009) on C57Bl/6J mouse pups at P8-9 (enucleation:  $n= 4$   
231 pups and 19 cells, sham:  $n= 5$  pups and 16 cells) and P12-15 (enucleation:  $n= 5$  pups and 15  
232 cells, sham:  $n= 4$  pups and 19 cells) after bilateral enucleation or sham surgery was performed  
233 on P1-2.

### 234 *Slice preparation*

235 Pups were deeply anesthetized with isofluorane (Fluriso, VetOne, Boise, ID). A block of brain  
236 containing primary ACX (A1) and the medial geniculate nucleus (MGN) was isolated and 500  $\mu\text{m}$   
237 thick thalamocortical slices were cut using a vibrating microtome (Leica, Deer Park, IL) in ice-cold  
238 artificial cerebrospinal fluid (ACSF) containing (in mM): 130 NaCl, 3 KCl, 1.25  $\text{KH}_2\text{PO}_4$ , 20  
239  $\text{NaHCO}_3$ , 10 glucose, 1.3  $\text{MgSO}_4$ , 2.5  $\text{CaCl}_2$  (pH 7.35-7.4, in 95% $\text{O}_2$ -5% $\text{CO}_2$ ). For A1 slices the  
240 cutting angle was  $\sim 15$  degrees from the horizontal plane (lateral raised) as described elsewhere  
241 (Cruikshank et al., 2002; Zhao et al., 2009). Thereafter, slices were incubated for  $\sim 1$  h in ACSF

242 at 30 °C and then were kept at room temperature before they were transferred to the recording  
243 chamber.

#### 244 Whole-cell recording:

245 For recording, slices were placed in a chamber on a fixed-stage microscope (Olympus BX51) and  
246 superfused at a rate of 2-4 ml/min with high-Mg ACSF (recording solution) at room temperature.  
247 High-Mg ACSF reduces spontaneous activity in the slice. The recording solution contained (in  
248 mM) 124 NaCl, 5 KCl, 1.23 NaH<sub>2</sub>PO<sub>4</sub>, 26 NaHCO<sub>3</sub>, 10 glucose, 4 MgCl<sub>2</sub>, 4 CaCl<sub>2</sub>. The location of  
249 the recording site in A1 was identified using established landmarks (Cruikshank et al., 2002; Zhao  
250 et al., 2009).

251 Whole-cell recordings were performed with a patch clamp amplifier (Multiclamp 700B,  
252 Axon Instruments, San Jose, CA) using pipettes with input resistance of 4-9 MΩ. Data acquisition  
253 was performed using National Instruments AD boards and custom software (Ephus) (Suter et al.,  
254 2010) written in MATLAB (Mathworks). Voltages were corrected for an estimated junction  
255 potential of 10 mV. Electrodes were filled with (in mM) 115 cesium methanesulfonate  
256 (CsCH<sub>3</sub>SO<sub>3</sub>), 5 NaF, 10 EGTA, 10 HEPES, 15 CsCl, 3.5 MgATP, 3 QX-314 (pH 7.25, 300 mOsm).  
257 Biocytin or Neurobiotin (0.5%) was added to the electrode solution as required. Series resistances  
258 were typically 20-25 MΩ.

#### 259 Laser scanning Photostimulation (LSPS)

260 LSPS was performed using previously published methods (Meng et al., 2015, 2017; Meng et al.,  
261 2021; Viswanathan et al., 2017). Briefly, 0.5-1 mM caged glutamate (*N*-(6-nitro-7-  
262 coumarylmethyl)-L-glutamate; Ncm-Glu) (Kao, 2006; Muralidharan et al., 2016) was added to the  
263 ACSF solution. Without UV light, this compound does not have any effect on neuronal activity  
264 (Kao, 2006). UV laser light (500 mW, 355 nm, 1 ms pulses, 100 kHz repetition rate, DPSS lasers)  
265 was split by a 33% beam splitter (CVI Melles Griot), attenuated by a Pockels cell (Conoptics),

266 gated with a laser shutter (NM Laser), and coupled into a microscope via scan mirrors (Cambridge  
267 Technology) and a dichroic mirror. The laser beam entered the slice axially through the objective  
268 (Olympus 10x, 0.3NA/water) and had a diameter of  $<20\ \mu\text{m}$ . Laser power at the sample was  $< 25$   
269 mW. We typically stimulated up to  $30\times 35$  sites spaced  $40\ \mu\text{m}$  apart that enabled us to probe areas  
270 of  $1\ \text{mm}^2$ . Such dense sampling reduced the influence of spontaneous events. Stimuli were  
271 applied at 0.5-1 Hz.

## 272 Data analysis

273 LSPS was analyzed as described previously (Meng et al., 2015, 2017; Meng et al., 2021;  
274 Mukherjee et al., 2021) with custom software written in MATLAB. To detect monosynaptically  
275 evoked postsynaptic currents (PSCs), we identified PSCs with onsets in an approximately 50-ms  
276 window after the stimulation. This window was chosen as previously observed spiking latency  
277 under our recording conditions (Meng et al., 2015, 2017; Meng et al., 2021; Mukherjee et al.,  
278 2021).

279 Recordings were performed at room temperature and in high- $\text{Mg}^{2+}$  solution to reduce the  
280 probability of multisynaptic inputs. We measured both peak amplitude and transferred charge  
281 (integrating the PSC). While the transferred charge may include contributions from multiple  
282 events, our prior studies showed a strong correlation between these measures (Meng et al., 2014;  
283 Viswanathan et al., 2017). Traces containing a short-latency ( $< 8\ \text{ms}$ ) 'direct' response were  
284 discarded from the analysis as were traces that contained longer latency inward currents of long  
285 duration ( $>50\ \text{ms}$ ). These currents could sometimes be seen in locations surrounding ( $<100\ \mu\text{m}$ )  
286 areas that gave a 'direct' response. Occasionally, some of the 'direct' responses contained  
287 synaptically evoked responses that we did not separate out, leading to an underestimation of local  
288 short-range connections. Cells that did not show any large ( $>100\ \text{pA}$ ) direct responses were  
289 excluded from the analysis as these could reflect astrocytes or migrating neurons. It is likely that  
290 the observed PSCs at each stimulus location represented the activity of multiple presynaptic cells.

291 Stimulus locations that showed PSCs were deemed connected and we derived binary  
292 connection maps. We aligned connection maps for SPNs in the population and averaged  
293 connection maps to derive a spatial connection probability map. In these maps the value at each  
294 stimulus location indicates the fraction of SPNs that received input from these stimulus locations.  
295 Layer boundaries were determined from the infrared images. Next, we derived laminar measures  
296 including the input area, integration distance, percentage of excitatory and inhibitory input from  
297 each layer, mean and total charge, mean peak and total amplitudes of EPSCs and IPSCs. We  
298 calculated the input area for each layer as a measure reflecting the number of presynaptic  
299 neurons in each layer projecting to the cell under study. Input area is calculated as the area within  
300 each layer that gave rise to PSCs. We also calculated the percentage of input from each layer.  
301 Intralaminar integration distance indicates the extent in the rostro-caudal direction that  
302 encompasses connected stimulus locations in each layer. Mean charge denotes the average  
303 charge of PSCs from each stimulus location in each layer. Peak amplitude measures the mean  
304 peak amplitude of EPSCs and IPSCs from each layer. Total charge and amplitude were  
305 calculated by multiplying total input area with mean charge and mean peak amplitude,  
306 respectively. Since the tonotopic map is largely in the rostro-caudal axis, the intralaminar  
307 integration distance reflects integration across the tonotopic axis. While the input area and  
308 intralaminar integration are related, the input area shows changes along the columnar (pia-  
309 ventricle) axis if more or fewer cells within a tonotopic place are recruited, e.g., only L5 cells vs.  
310 L5 and L6 cells. We calculated E/I balance index in each layer for measures of mean charge,  
311 mean peak amplitude, total charge and total amplitude as  $(E-I)/(E+I)$ , thus  $(Area_E -$   
312  $Area_I)/(Area_E + Area_I)$ , resulting in a number that varied between -1 and 1, with 1 indicating  
313 dominant excitation and -1 indicating dominant inhibition. Since a measurement of E is not  
314 possible close to the soma due to direct responses, we excluded the direct area from both the E  
315 and I maps. Thus, this E/I measure does not account for the contribution for cells from close-by

316 locations but does allow analysis of the E/I balance of inputs arising from different layers. We  
317 quantified circuit similarity by calculating correlation between connection maps.

### 318 Statistics

319 Results are plotted as mean  $\pm$  SEM unless otherwise stated. Populations from enucleated and  
320 sham groups were compared with a rank sum or Mann-Whitney U-test and considered significant  
321 if  $p < 0.05$ .

### 322 Data availability

323 All data needed to evaluate the conclusions in the paper are presented in the paper and/or the  
324 supplemental materials. Additional data related to this paper may be requested from the authors.

325

## 326 **Results:**

327 We aimed to investigate crossmodal changes in ACX. The predominant activity in the developing  
328 visual system are the spontaneous retinal waves arising from synchronous firing of the retinal  
329 ganglion cells (Blankenship & Feller, 2010; Maccione et al., 2014). Importantly, light stimulation  
330 through the closed eyelids can alter retinal waves in neonatal mice (Tan et al., 2021; Tiriach et al.,  
331 2018). While transgenic mouse lines can alter spontaneous retinal waves at different ages  
332 (Bansal et al., 2000), and dark-exposure or lid suture prevents patterned visual inputs from the  
333 periphery without affecting retinal spontaneous activity (Chen et al., 2014; Morales et al., 2002),  
334 bilateral enucleation irreversibly eliminates both spontaneous and sensory (light-driven) activity  
335 at once by instantly and completely removing the eye and retina (Aerts et al., 2014). Although  
336 spontaneous thalamic bursts can persist for a certain period after removal of retinal waves (Weliky  
337 & Katz, 1999), complete retinal deprivation abolishes early peripheral activity in the visual

338 pathway. Therefore, we chose bilateral enucleation at birth (~P1) to completely remove retinal  
339 activity from the earliest ages on.

340 To examine ACX function after neonatal enucleation, we performed in vivo widefield  
341 imaging to record spontaneous and sound-evoked activity in the ACX. Activity in the ACX reflects  
342 two sources, peripherally and centrally generated activity. Spontaneous activity originating in the  
343 cochlea (Wang & Bergles, 2015) is transmitted via the brainstem and ascending auditory  
344 pathways to the developing mouse ACX and is present P7 or earlier (Babola et al., 2018).  
345 Centrally generated spontaneous events are also observed in the neonatal ACX (Meng et al.,  
346 2021; Mukherjee et al., 2021). Sound-evoked activity originating in the cochlea can be recorded  
347 in the ACX by P8 before the onset of the critical period (precritical period, **Fig. 1A**).

348

#### 349 **Altered spontaneous cortical activity at the end of the first and second postnatal weeks** 350 **after complete retinal deprivation at birth**

351 We performed in vivo widefield imaging in pups expressing calcium indicator GCaMP6 in cortical  
352 excitatory neurons under Thy1 promoter (JAX strain no. 024275). We performed imaging before  
353 and after the ear canals are open (~P11) to evaluate the impact of low threshold auditory  
354 experience (P8-9 enucleation:  $n=9$ , sham:  $n=8$  and P12-15 enucleation:  $n=9$ ; sham:  $n=8$ , **Fig. 1B**,  
355 **C**). The latter time point coincides with the onset of the critical period (Barkat et al., 2011). In vivo  
356 imaging was performed through the intact and cleared skull (Zhao et al., 2018) ~200-400  $\mu\text{m}$   
357 below the brain surface (**Fig. 1D**). We measured both spontaneous and sound evoked activity.  
358 Spontaneous activity was imaged for 10 min during which no external sound was played. We  
359 then, as in our prior studies, found pixels with strong temporal correlation across the image and  
360 grouped them together into single components (ROIs, **Fig. 1D**) (J. Liu et al., 2019; Meng et al.,  
361 2021; Mukherjee et al., 2021). As expected, (Meng et al., 2021; Mukherjee et al., 2021),



362 spontaneous activity consisted of high (H) and low (L) synchronization events distinguished by  
363 size (**Fig. 1E**). H- and L-events were first demonstrated in the visual cortex and represent central  
364 and peripheral sources, respectively (Siegel et al., 2012). Removal of the cochlea reduces the  
365 amplitude of ACX L-events consistent with their peripheral origin (Meng et al., 2021; Mukherjee  
366 et al., 2021).

367 Next, we compared the amplitude of spontaneous events in each ROI between the  
368 enucleated (enu) and sham control (sham) pups across ages. When compared with the sham  
369 controls, the amplitude of the spontaneous H-events was higher in the enucleated pups at P8-9  
370 (medians; sham: 82.3% enu: 92.7%,  $P < 0.001$ ), and at P12-15 (medians; sham: 54.9% enu:  
371 57.1%,  $P < 0.001$ ) (**Fig. 1F**, left), although the effect size was comparatively smaller at the latter  
372 age. In contrast, the spontaneous L-events of peripheral origin were mostly unaffected after  
373 enucleation. While the amplitude of the spontaneous L-events was marginally higher in  
374 enucleated pups at P8-9, the effect size was small (medians; sham: 32.7% enu: 32.9%,  $P < 0.002$ ).  
375 The amplitude of spontaneous L-events was similar between groups at P12-15 (medians; sham:  
376 27.1% enu: 27%,  $P > 0.05$ ) (**Fig. 1F**, right). These results suggest that enucleation strengthened  
377 spontaneous events of central origin but did not affect spontaneous events originating from the  
378 cochlea.

379 We next compared the frequency of spontaneous H- and L- events (represented as inter-  
380 event intervals). When compared with sham controls, the frequency of H-events was higher in  
381 enucleated pups at both ages (interevent interval medians; P8-9 sham: 19.1 s enu: 16.8 s,  
382  $P < 0.001$ , P12-15 sham: 64 s enu: 47.3 s,  $P < 0.003$ ) (**Fig. 1G**, left) suggesting an immediate  
383 increase in the number of central events after enucleation that persists after the second postnatal  
384 week. In contrast, the frequency of L-events was slightly lower in enucleated pups at both ages  
385 (interevent interval medians; P8-9 sham: 17.1 s enu: 20.7 s,  $P < 0.001$ , P12-15 sham: 8 s enu: 9 s  
386  $P < 0.001$ ) (**Fig. 1G**, right), possibly due to a homeostatic compensation. Together these results

387 indicate that early enucleation causes an increase in the amplitude and frequency of centrally  
388 generated spontaneous H-events.

389 Age-related changes in the spontaneous H-and L-event amplitude and inter-event interval  
390 have been demonstrated previously. The amplitude of spontaneous H- and L-events are higher  
391 at P8-9 than P12-15. The inter-event interval of spontaneous H-events is lower and that of L-  
392 events is higher at P8-9 than P12-15 (Meng et al., 2021; Mukherjee et al., 2021). These age-  
393 related changes in amplitude and inter-event interval and thus frequency of spontaneous H- and  
394 L-events were unaffected after enucleation (**Fig. S1**).

395 Spontaneous events can correlate distant cortical locations and manipulations of auditory  
396 peripheral activity can change these correlations with auditory deprivations resulting in higher  
397 correlations of distant ROIs (Meng et al., 2021; Mukherjee et al., 2021). We thus investigated if  
398 enucleation altered the spatial correlation of spontaneous activity across ROIs spanning the  
399 cortical surface. After enucleation spatial correlations of spontaneous activity was similar between  
400 groups at P8-9 ( $P_s > 0.05$ ) (**Fig. 1H, left**), but correlation was higher in enucleated pups at P12-  
401 15, specifically at 600  $\mu\text{m}$  (medians: sham-0.49, enu-0.57,  $P < 0.05$ ) and 800  $\mu\text{m}$  (medians: 0.43  
402 sham-0.54, enu-,  $P < 0.05$ ) distances (**Fig. 1H, right**), suggesting distal cortical regions show more  
403 correlated activity with age after enucleation.

404 Together, these results suggest that early retinal deprivation crossmodally alters centrally  
405 generated spontaneous activity in the developing ACX during the precritical period. These  
406 spontaneous events are more frequent with higher amplitude and involve wider cortical areas with  
407 age.

## Figure 1

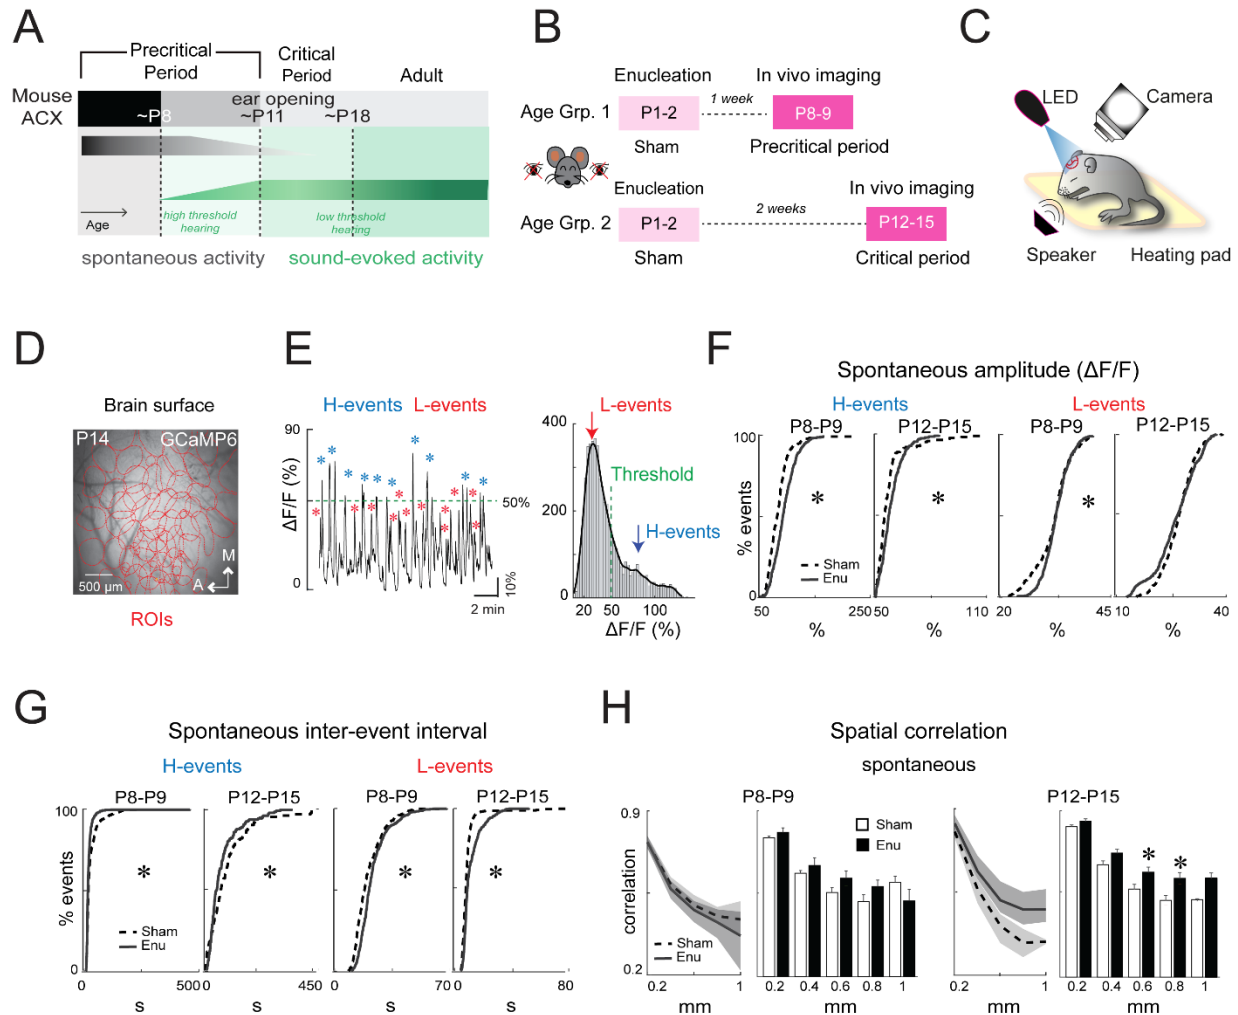

408

409 **Figure 1. Complete retinal deprivation at birth crossmodally alters spontaneous activity in**  
 410 **the ACX at P8-9 and P12-15**

411 **A.** Timeline of ACX development in mice. **B.** Timeline of enucleation surgery and experiments. **C.**  
 412 Experimental setup for in vivo widefield imaging in awake mouse pups. **D.** Surface of the brain  
 413 through intact and cleared skull in a representative pup. Open red circles indicate ROIs identified  
 414 using dimensionality reduction technique. **E.** Raw trace (left) and histogram (right) showing  
 415 identification of H- and L-events in a representative pup. **F.** Cumulative distribution functions  
 416 (CDFs) showing peak amplitude of spontaneous H- and L-events in sham (dashed line) and  
 417 enucleated (solid line) pups at both ages. Amplitude of H-events (left) was higher at both ages

418 (P8-9;  $p < 0.001$ , Cohen's  $d$ : -0.6, P12-15:  $p < 0.001$ , Cohen's  $d$ : -0.2) and that of L-events (right)  
419 was higher only at P8-9 ( $p < 0.002$ , Cohen's  $d$ : -0.2) in enucleated pups. **G.** CDFs showing inter-  
420 event interval of H-events (left) was lower (P8-9;  $p < 0.001$ , Cohen's  $d$ : 0.3, P12-15;  $p < 0.003$ ,  
421 Cohen's  $d$ : 0.3) and that of L-events (right) was higher (P8-9;  $p < 0.001$ , Cohen's  $d$ : -0.3, P12-15:  
422  $p < 0.001$ , Cohen's  $d$ : -0.4) at both ages in enucleated pups. **H.** Spatial correlation of spontaneous  
423 events was higher at 600  $\mu\text{m}$  ( $p < 0.05$ , Cohen's  $d$ : -0.7) and 800  $\mu\text{m}$  ( $p < 0.05$ , Cohen's  $d$ : -0.8)  
424 distances in enucleated pups at P12-15. ACX: auditory cortex; P: postnatal day; ROI: region of  
425 interest; M: medial; A: anterior; H-events: high synchronization events; L-events: low-  
426 synchronization events;  $\Delta F/F$ : change in fluorescence; sham: sham control pups; enu: enucleated  
427 pups.

428

#### 429 **Transient increase in sound-driven cortical activity at the end of the first postnatal week** 430 **after complete retinal deprivation at birth**

431 We next examined whether sound-evoked activity in ACX was impacted by enucleation. Sound-  
432 evoked responses were recorded after multiple repeats of pure tones of different frequencies  
433 were played at 80 dB sound pressure level (Meng et al., 2021; Mukherjee et al., 2021).

434 Sound-evoked activity was analyzed using previously published methods (Meng et al.,  
435 2021; Mukherjee et al., 2021). Sound-responsive ROIs were identified as ROIs that showed  
436 significant increase in fluorescence ( $\Delta F/F$ ) after tone onset for at least one frequency (**Fig 2A**)  
437 (Meng et al., 2021; Mukherjee et al., 2021). Sound-responsive ROIs were present in both  
438 enucleated and sham control pups at both ages. The numbers, total area, and average area of  
439 responsive ROIs were similar between groups at both ages (**Fig. S2A**), suggesting cortical area  
440 responding to sound stimulation does not differ after enucleation at these ages. There was,  
441 however, a significant variability among pups.

442           Next, we calculated the mean fluorescence amplitude within a 3-s window after sound  
443 presentation and compared between groups. While the amplitude of the overall sound-evoked  
444 responses was marginally higher in the enucleated pups at P8-9 (medians sham: 14.2%; enu:  
445 15.2%,  $P < 0.02$ ) it was marginally lower at P12-15 (medians sham: 11.5%; enu: 10%,  $P < 0.0003$ )  
446 compared their sham controls (**Fig. 2B**). Sound-responsive ROIs can exhibit high variability  
447 between trials (Meng et al., 2021; Mukherjee et al., 2021) likely due to weak or immature synapses  
448 along the auditory pathway. To identify if enucleation altered this variability, we calculated Fano  
449 factor of response amplitude as a measure of variance of sound-evoked activity. Fano factor of  
450 response amplitude was slightly higher in enucleated pups at P8-9 (sham: 0.23 enu: 0.25,  
451  $P < 0.002$ ) and at P12-15 (sham: 0.036 enu: 0.043,  $P < 0.002$ ) suggesting enucleation induces some  
452 variability in sound responses (**Fig. 2C**), which could be due to an increase in cortically generated  
453 spontaneous activity (**Fig. 1**).

454           Sound-evoked activity comprises both H- and L-events (Meng et al., 2021; Mukherjee et  
455 al., 2021). We next compared the amplitude of sound-evoked H- and L-events between groups  
456 across ages. The amplitude of sound-evoked H-events was higher in enucleated pups at P8-9  
457 (median: sham: 76.2%; enu: 87.6%,  $P < 0.0001$ ) and at P12-15 (median: sham: 56.8%; enu: 61%,  
458  $P < 0.004$ ) compared to the sham controls. In contrast, the amplitude of the sound-evoked L-events  
459 was similar between groups at P8-9 (medians sham: 28.7% enu: 29.1%,  $P > 0.05$ ), and P12-15  
460 (medians sham: 21.7% enu: 22.8%,  $P > 0.05$ ; **Fig. 2D**). These results indicate that early  
461 enucleation leads to amplified sound-evoked H-events at both ages without affecting the  
462 periphery-driven L-events. Like spontaneous events, the age-related changes in evoked H- and  
463 L-event amplitude were unaltered after enucleation (**Fig. S2B**).

464           We next calculated and compared spatial correlation of sound-evoked activity between  
465 groups. The correlation trended higher in enucleated pups at P12-15 but not at P8-9 (**Fig. 2E**).

466 Together these results suggest that enucleation at birth results in a slight increase in  
467 cortical sound-responsiveness involving larger amplitudes. These changes are due to the  
468 increase in amplitude of sound-evoked H-events, not affecting periphery originated L-events.

## Figure 2

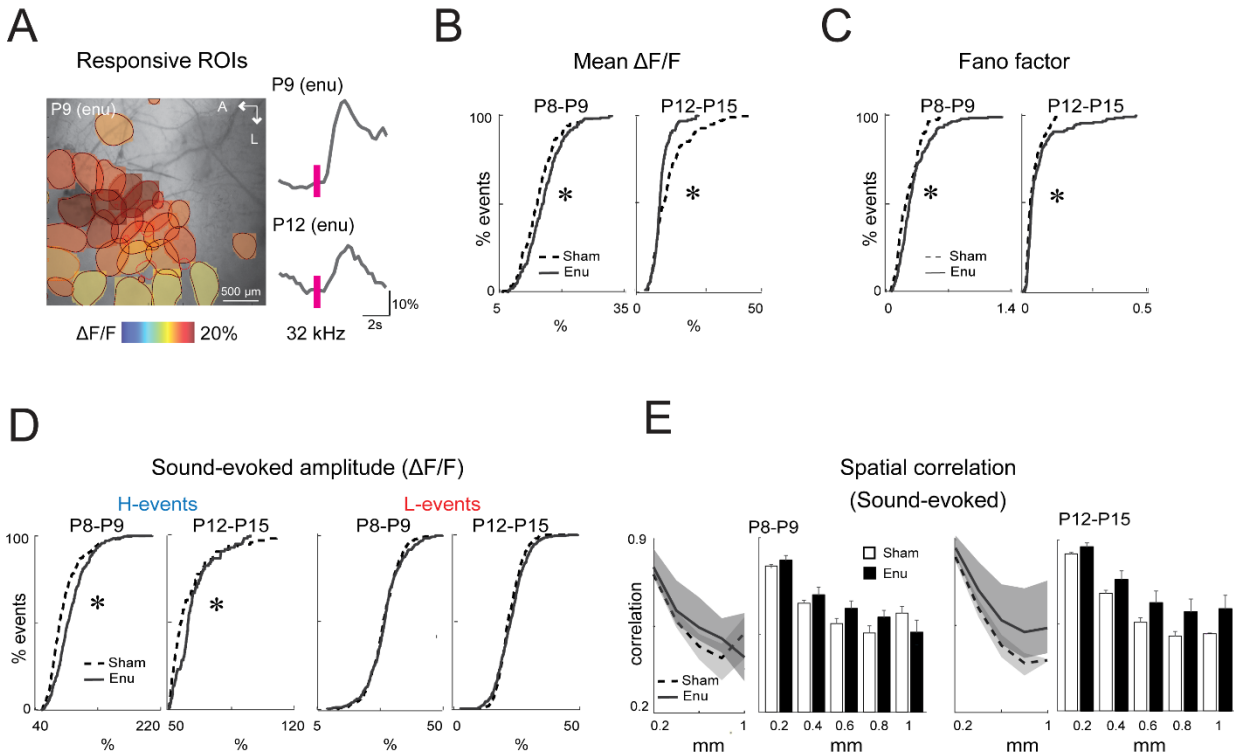

469

470 **Figure 2. Complete retinal deprivation at birth alters sound-evoked activity in the ACX at**  
471 **P8-9 and P12-15**

472 **A.** Left: filled areas denote responding ROIs that showed significant increase in fluorescence  
473 ( $\Delta F/F$ ) within a 3-s window after tone onset. Pseudo-colors indicate mean  $\Delta F/F$  of responding  
474 ROIs. Right: Fluorescence time-course of two representative responding ROIs at P8 (top) and  
475 P12 (bottom) after a 32-kHz tone was presented, showing sound-responsiveness in the ACX at  
476 these ages. **B.** CDFs showing the mean amplitude of sound-evoked responses was higher  
477 ( $p < 0.02$ , Cohen's  $d$ : -0.1) at P8-9 and lower ( $p < 0.0003$ , Cohen's  $d$ : 0.6) at P12-15 in enucleated

478 pups. **C.** CDFs showing the fano factor of evoked amplitude was higher (P8-9;  $p < 0.002$ , Cohen's  
479  $d: -0.2$ , P12-15;  $p < 0.002$ , Cohen's  $d: -0.1$ ) at both ages in enucleated pups suggesting increased  
480 variability in the sound-evoked responses, which could be due to an increase in spontaneous  
481 activity. **D.** CDFs showing the peak amplitude of sound-evoked H-events (left) was higher at both  
482 ages (P8-9;  $p < 0.0001$ , Cohen's  $d: -0.3$ , P12-15;  $p < 0.004$ , Cohen's  $d: -0.2$ ), whereas that of L-  
483 events (right) was not different between groups across ages. **E.** Spatial correlation of sound-  
484 evoked events were similar between enucleated and sham control pups across ages.

485

### 486 **Inhibitory connections to SPNs are altered at the end of the first postnatal week after** 487 **enucleation at birth**

488 The observed changes in ACX activity after enucleation might be mirrored by crossmodal  
489 changes in functional connectivity in the ACX. Since early born SPNs are the first neurons in ACX  
490 to respond to sound they are also vulnerable to a wide range of intramodal sensory and  
491 environmental perturbation (Meng et al., 2021; Mukherjee et al., 2021; Sheikh et al., 2019). We  
492 thus evaluated the functional connectivity to SPNs after retinal deprivation at birth. To identify  
493 circuits to SPNs we used laser-scanning photostimulation (LSPS) combined with whole-cell patch  
494 clamp recordings (Meng et al., 2021; Mukherjee et al., 2021; Viswanathan et al., 2017) from SPNs  
495 in thalamocortical slices containing ACX (Cruikshank et al., 2002) at P8-9 (enu:  $n = 4$  pups and 19  
496 cells, sham:  $n = 5$  pups and 16 cells and at P12-15 (enu:  $n = 5$  pups and 15 cells, sham:  $n = 4$  pups  
497 and 19 cells, **Fig. 3A**, left).

498 LSPS measures the functional spatial connection pattern on neurons with  $\sim 100 \mu\text{m}$   
499 resolution over  $1 \text{ mm}^2$  area, which encompasses the whole cortical extent and about 30% of the  
500 mouse ACX. LSPS induces action potential in targeted neurons when the laser beam is close to  
501 the soma or proximal dendrites. If the activated neuron is connected to the recording neuron, an

502 evoked postsynaptic current (PSC) is observed (**Fig. 3A**, right). For each recorded SPN (**Fig. 3B**),  
503 we stimulated 900-1000 locations within the slice and measured the amplitude of evoked  
504 excitatory (E) and inhibitory (I) PSCs from each stimulus location by holding the recorded SPN at  
505 -70 mV ( $E_{GABA}$ ) or 0 mV ( $E_{Glut}$ ), respectively (**Fig 3C**).

506 First, we compared spatial connection pattern of excitatory and inhibitory inputs in  
507 enucleated pups with their sham counterparts at the end of the first postnatal week (**Fig 3D**). We  
508 derived spatial connection maps by plotting the EPSC or IPSC charges at each location. To  
509 qualitatively compare spatial connectivity in intra- and interlaminar connections, we aligned the  
510 individual connection maps to the position of the patched SPN soma and calculated the  
511 percentage of cells receiving inputs from a particular location (**Fig. 3E**). This yields a map of the  
512 spatial connection probability of excitatory and inhibitory connections of the patched SPNs. We  
513 did not observe any obvious differences in connection probability from these qualitative maps  
514 (**Fig. 3F**).

515 Next, we quantified changes in laminar circuits impinging on the recorded SPNs. For each  
516 SPN we calculated the input area, the spatial range of inputs along the tonotopic (rostral-caudal)  
517 axis (integration distance) and percentage input received from other cortical layers. The excitatory  
518 input, integration distance and percentage input from each layer to the SPNs were similar  
519 between both groups (**Fig. 3G, S3A**,  $P>0.05$ ). Mean charges and peak amplitudes of EPSCs were  
520 also similar between groups ( $P>0.05$ , **Fig. 3H, S3B**).

521 We next measured the impact of enucleation in inhibitory inputs. Although the percentage  
522 of inhibitory inputs from different layers was similar between groups ( $P>0.05$ ), the input area from  
523 within the SPNs was lower ( $P<0.05$ ) and the integration distance from L5/6 and within the SPNs  
524 were also lower (L5/6:  $P<0.02$ , SPNs:  $P<0.01$ ) in enucleated pups (**Fig. 3I, S3C**), indicating a  
525 narrower range of intralaminar inputs after enucleation. Mean IPSC charge ( $P<0.05$ ) from within



526 SPNs and peak IPSC amplitude from L5/6 and within SPNs were lower in enucleated pups (L5/6:  
527  $P < 0.05$ , SPNs:  $P < 0.006$ ) (**Fig. 3J, S3D**).

## Figure 3

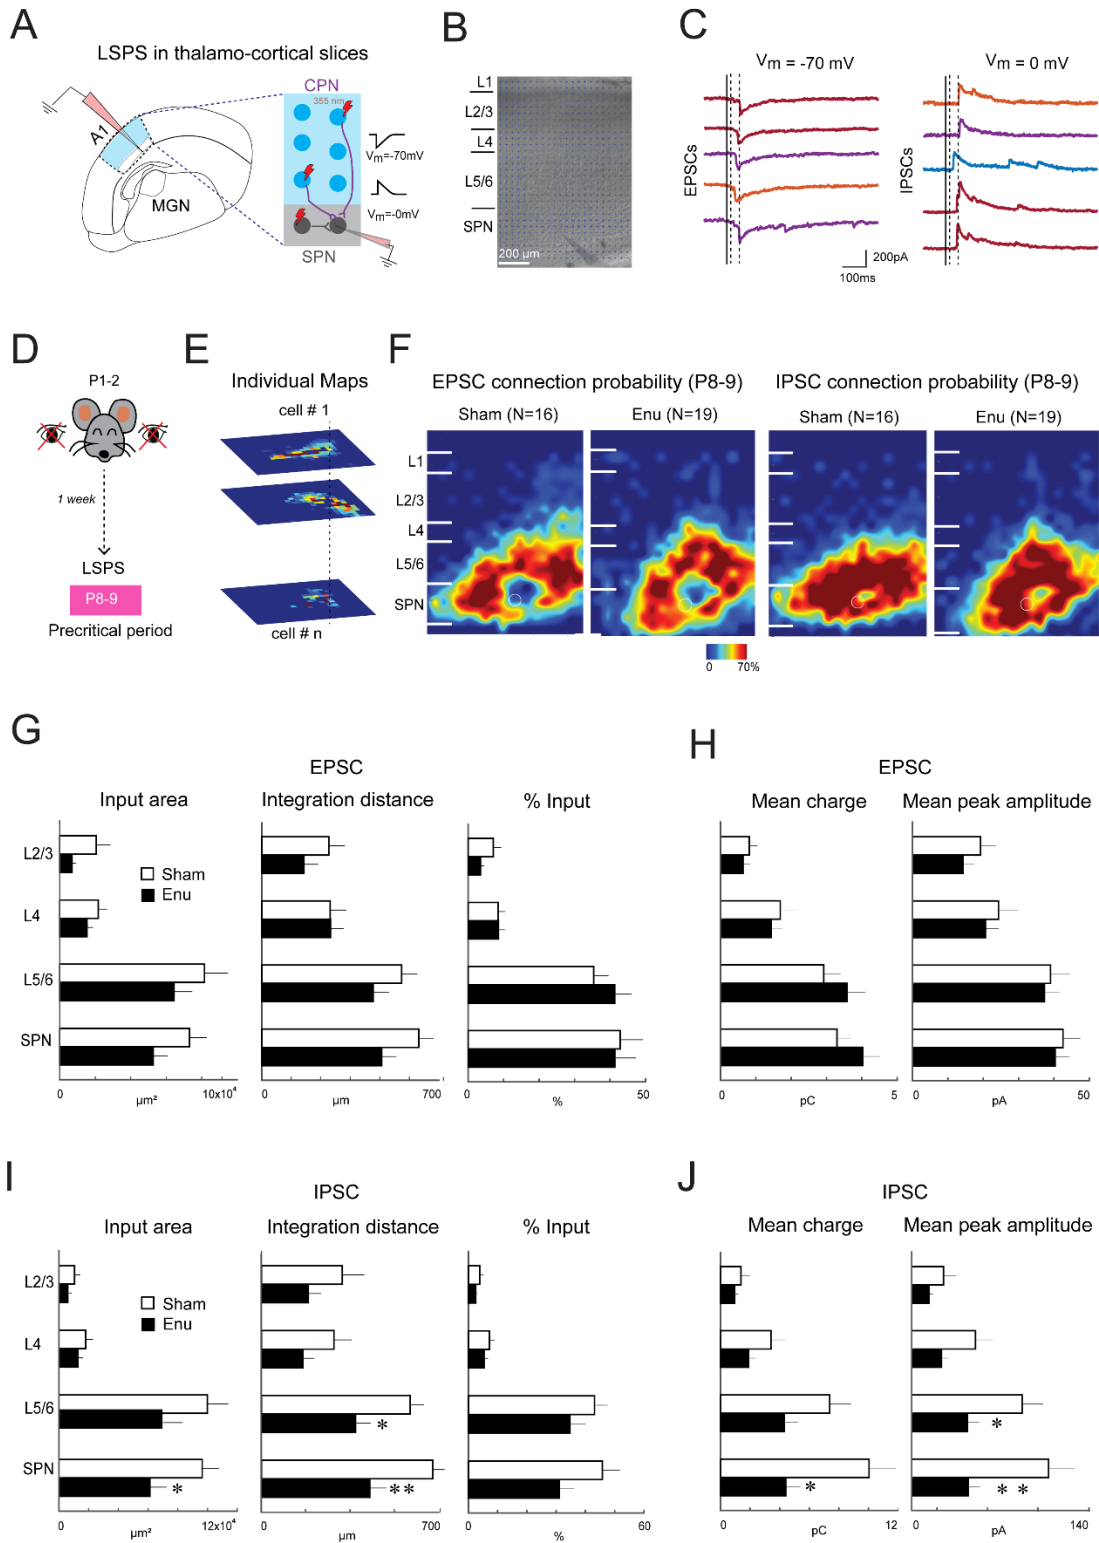

529 **Figure 3. Complete retinal deprivation at birth crossmodally alters inhibitory inputs to**  
530 **SPNs at P8-9**

531 **A.** Left: Cartoon showing whole-cell patch clamp recording from subplate neurons (SPNs) in  
532 thalamo-cortical slices. Right: schematic showing laser scanning photostimulation (LSPS).  
533 Neurons are activated by laser photolysis (355 nm) of caged glutamate. If stimulated cells are  
534 connected to the recorded SPN, evoked excitatory or inhibitory postsynaptic currents (EPSCs and  
535 IPSCs) are seen. **B.** Infrared image of an example brain slice with patch pipette on a SPN. **C.**  
536 Whole-cell voltage clamp recordings at -70 mV (left) and 0 mV (right) to identify excitatory and  
537 inhibitory connections, respectively. Example traces of EPSCs (left) and IPSCs (right) are shown.  
538 **D.** Experimental timeline for in vitro experiments during the precritical period after enucleation. **E.**  
539 Schematic demonstration of the assembly of connection probability maps by aligning individual  
540 maps to the SPN soma (white dashed circle). **F.** Spatial connection probability maps of excitatory  
541 and inhibitory connections to the SPN at P8-9. Solid white lines show marginal boundaries. **G.**  
542 Bar graphs comparing the layer-specific source area, integration distance and percentage input  
543 of excitatory connections between sham (white) and enucleated (black) pups. **H.** Bar graphs  
544 showing comparison of layer-specific mean charge and peak amplitude of excitatory connections  
545 between sham and enucleated pups. **I.** Bar graphs comparing the layer-specific source area,  
546 integration distance and percentage input of inhibitory connections between sham and enucleated  
547 pups. Input area from within SPN was lower ( $p < 0.05$ , Cohen's  $d$ : 0.7) and integration distance  
548 from L5/6 and SPN was lower (L5/6;  $p < 0.02$ , Cohen's  $d$ : 0.8, SPN;  $p < 0.01$ , Cohen's  $d$ : 1) in  
549 enucleated pups. **J.** Bar graphs comparing layer-specific mean charge and peak amplitude of  
550 inhibitory connections between sham and enucleated pups. Mean charge from SPNs was lower  
551 ( $p < 0.05$ , Cohen's  $d$ : 0.8) and mean peak amplitude from L5/6 and SP was lower (L5/6;  $p < 0.05$ ,  
552 Cohen's  $d$ : 0.8, SPN;  $p < 0.006$ , Cohen's  $d$ : 1) in enucleated pups. A1: primary auditory cortex;

553 MGN: medial geniculate nucleus; CPN: cortical plate neuron; SPN: subplate neuron; L: layer;  $V_m$ :  
554 holding voltage.

555

556 SPNs in ACX show diverse circuit patterns and the diversity of patterns can be sculpted  
557 by auditory experience (Meng et al., 2021; Mukherjee et al., 2021). We thus next investigated if  
558 enucleation altered SPN diversity by calculating the correlations between connection maps. We  
559 found that enucleated pups exhibited lower circuit similarity of excitatory inputs from L5/6  
560 ( $P < 0.0004$  **Fig. 4A, S4**). Thus, excitatory inputs from L5/6 to SPNs were more diverse after  
561 enucleation. The circuit similarity of inhibitory inputs from L4, L5/6 and SPNs increased after  
562 enucleation (L4:  $P < 0.0001$ , L5/6:  $P < 0.02$ , SPNs:  $P < 0.0001$ ; **Fig. 4B, S4**). These suggests that  
563 early enucleation caused a hypoconnectivity of intralaminar inhibitory cortical connections and  
564 increased circuit similarity within the ACX SPNs of at P8-9.

565 So far, we investigated the average changes in excitatory and inhibitory connections  
566 separately, which could obscure changes in the level of single neurons. We thus quantified  
567 excitatory and inhibitory changes at the single cellular level. We calculated E/I balance index,  $[(E-$   
568  $I)/(E+I)]$ , of mean and peak amplitudes as well as total charges and total amplitudes for each cell  
569 to quantify combined excitatory and inhibitory circuit changes. The E/I balance indices based on  
570 relative mean and total input charge from L5/6 and SPNs were higher (mean charge: L5/6  
571  $P < 0.009$ , SPNs:  $P < 0.001$ ; total charge: L5/6:  $P < 0.003$ , SPNs:  $P < 0.006$ ) in enucleated pups (**Fig.**  
572 **4C**). Similarly, E/I balance indices based on peak and total amplitude from L5/6 and SPNs were  
573 higher (peak amplitude: L5/6  $P < 0.03$ , SPNs:  $P < 0.003$ ; total amplitude: L5/6:  $P < 0.003$ , SPNs:  
574  $P < 0.006$ ; **Fig. 4D**) in enucleated pups. This indicates a relative change in balance towards  
575 excitation after enucleation. Together, these results suggest hypoconnectivity and reduced  
576 strengths of inhibitory inputs to ACX SPNs at P8-9 after birth enucleation. These changes are

577 consistent with the overall increase in intracortical activity of excitatory neurons at the end of the  
 578 first postnatal week as observed in in vivo imaging (**Figs 1 and 2**).

Figure 4

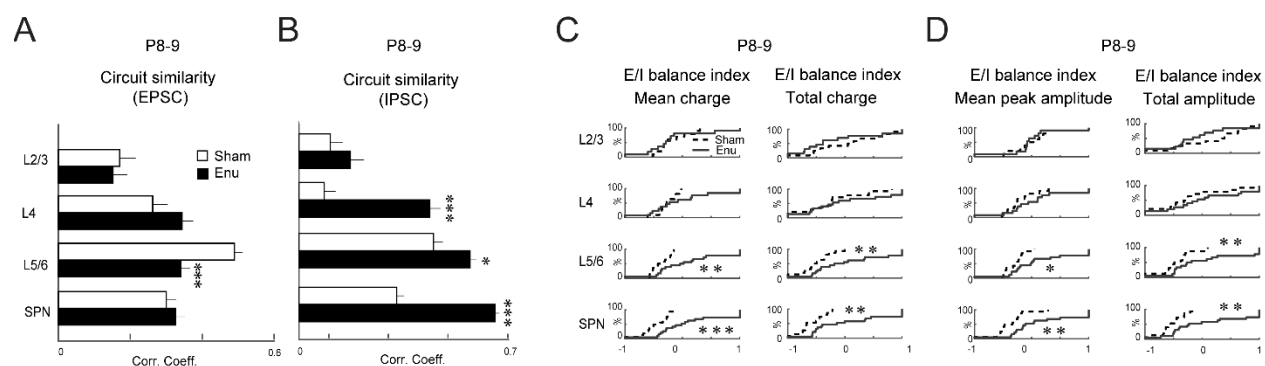

579

580 **Figure 4. Complete retinal deprivation at birth crossmodally alters inhibitory connection**  
 581 **strength to SPNs at P8-9**

582 **A.** Bar graphs showing layer-specific comparison of correlation connection maps of excitatory  
 583 inputs. Correlation from L5/6 was lower ( $p < 0.0004$ , Cohen's  $d$ : 0.6) in enucleated pups. **B.** Bar  
 584 graphs comparing layer-specific correlation connection maps of inhibitory inputs. Correlation from  
 585 L4, L5/6 and SPNs were higher (L4;  $p < 0.0001$ , Cohen's  $d$ : -0.8, L5/6;  $p < 0.02$ , Cohen's  $d$ : -0.5,  
 586 SPN;  $p < 0.0001$ , Cohen's  $d$ : -1.4) in enucleated pups. **C.** CDFs showing layer-specific comparison  
 587 of E/I balance index,  $[(E-I)/(E+I)]$ , of mean charge and total charge. E/I balance indices of mean  
 588 and total charge in L5/6 and SPNs were higher (mean charge L5/6;  $p < 0.009$ , Cohen's  $d$ : -1, mean  
 589 charge SPN;  $p < 0.001$ , Cohen's  $d$ : -1, total charge L5/6;  $p < 0.003$ , Cohen's  $d$ : -1, total charge SPN;  
 590  $p < 0.006$ , Cohen's  $d$ : -1) in enucleated pups. **D.** CDFs show layer-specific comparison of E/I  
 591 balance index of peak amplitude and total amplitude of postsynaptic currents. E/I balance indices  
 592 of peak and total amplitude in L5/6 and SPNs were higher (peak amplitude L5/6;  $p < 0.03$ , Cohen's  
 593  $d$  -0.9, peak amplitude SPN:  $p < 0.003$ , Cohen's  $d$ : -1; total amplitude L5/6:  $p < 0.003$ , Cohen's  $d$ : -  
 594 1, total amplitude SPN:  $p < 0.006$ , Cohen's  $d$ : -1) in enucleated pups.

595 **Excitatory and inhibitory connections to SPNs are altered at the end of the second**  
596 **postnatal week after enucleation at birth**

597 Our functional imaging showed that spontaneous and sound evoked activity in enucleated  
598 animals remained altered at P12-P15. We thus next investigated whether SPN circuit changes  
599 persisted after ear-opening (P12-15, **Fig. 5A**). The connection probability maps of excitatory  
600 inputs at P12-15 showed relatively fewer connections from within the SPNs and more connections  
601 from L4 and L2/3 in enucleated pups (**Fig. 5B**). In contrast, the connection probability maps of  
602 inhibitory inputs were almost similar in both groups (**Fig. 5C**). We next quantified the laminar  
603 circuits impinging on the SPNs. The overall and percentage input area and integration distance  
604 of excitatory inputs did not show any difference between groups ( $P>0.05$ , **Fig. 5D, S5A**), but the  
605 mean charge of excitatory connections from L2/3 was higher ( $P<0.02$ ) in enucleated pups (**Fig.**  
606 **5E, S5B**). The laminar measures of inhibitory inputs also did not differ between groups at these  
607 ages, except the integration distance from within SPNs were lower ( $P<0.003$ ) in enucleated pups  
608 (**Fig. 5F, S5C**). The mean charge and peak amplitude remained were unaffected ( $P>0.05$ , **Fig.**  
609 **5G, S5D**).

## Figure 5

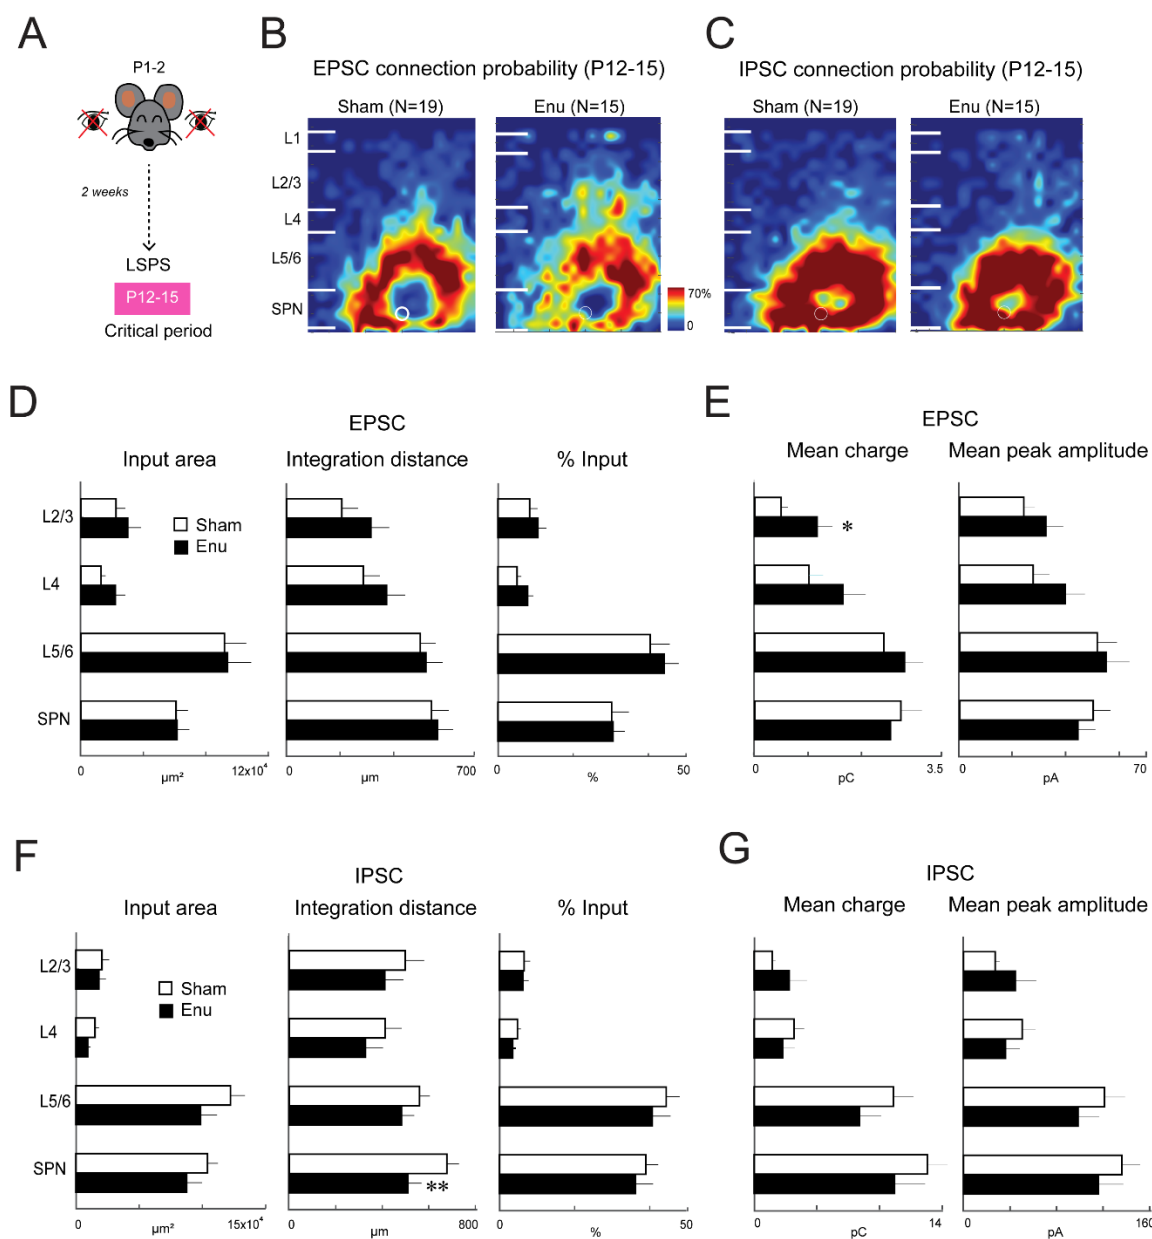

616 comparing the layer-specific source area, integration distance and percentage input of excitatory  
617 connections between sham (white) and enucleated (black) pups. **E.** Bar graphs comparing layer-  
618 specific mean charge and peak amplitude of excitatory connections between sham and  
619 enucleated pups. Mean charge from L2/3 was higher ( $p < 0.02$ , Cohen's  $d$ : -0.6) in enucleated  
620 pups. **F.** Bar graphs comparing the layer-specific source area, integration distance and  
621 percentage input of inhibitory connections between sham and enucleated pups. Integration  
622 distance from within SPNs was lower ( $p < 0.003$ , Cohen's  $d$ : 0.7) in enucleated pups. **G.** Bar graphs  
623 comparing layer-specific mean charge and peak amplitude of inhibitory connections between  
624 sham and enucleated pups.

625

626 We next investigated if enucleation altered SPN diversity at P12-15 by calculating the correlation  
627 between connection maps. The circuit similarity of excitatory inputs from L2/3 was higher  
628 ( $P < 0.008$ ) and that from within SPNs was lower ( $P < 0.004$ ) in enucleated pups (**Fig. 6A, S6**). This  
629 could explain the observed qualitative changes in the maps in **Fig. 5B**. Nonetheless, the circuit  
630 similarity of inhibitory inputs from L4 decreased ( $P < 0.008$ ) and that from L5/6 and within SPNs  
631 increased (L5/6:  $P < 0.002$ , SPNs:  $P < 0.0009$ ) after enucleation (**Fig. 6B, S6**).

632 After ear opening the E/I balance index based on mean and total charges was similar  
633 between groups ( $P > 0.05$ , **Fig. 6C**), whereas that based on total PSC amplitude from L4 and within  
634 SPNs was higher (L4:  $P < 0.05$ , SPNs:  $P < 0.04$ ) in enucleated pups (**Fig. 6D**) suggesting relative  
635 increase towards excitation in individual cells.

636 Together, these results suggest that bilateral enucleation at birth alters excitatory and  
637 inhibitory connections to the ACX SPNs at the end of the second postnatal week. Therefore,  
638 functional connectivity to ACX SPNs is crossmodally altered within the first two weeks after  
639 complete retinal deprivation at birth.



Figure 6

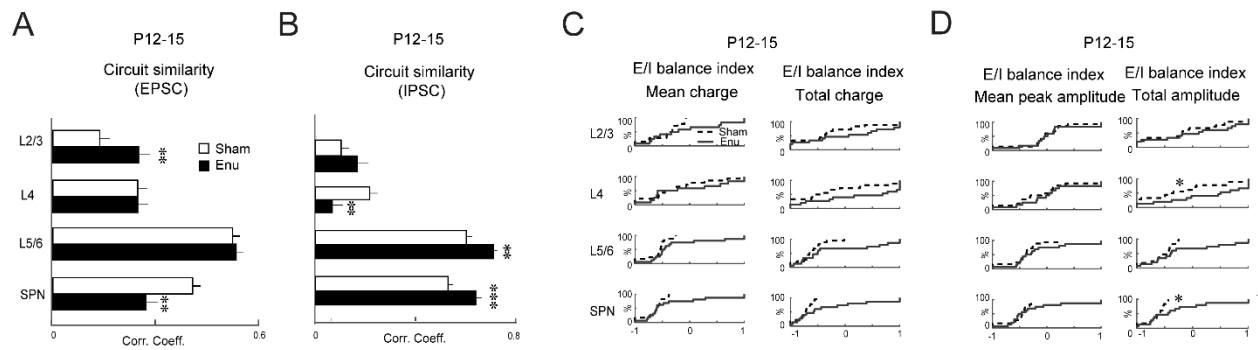

640

641 **Figure 6. Complete retinal deprivation at birth crossmodally alters excitatory inhibitory**  
 642 **connection strength to SPNs at P12-15**

643 **A.** Bar graphs showing layer-specific comparison of correlation connection maps of excitatory  
 644 inputs. Correlation was higher in L2/3 ( $p < 0.008$ , Cohen's  $d$ : -0.4) and lower in SPN ( $p < 0.004$ ,  
 645 Cohen's  $d$ : 0.5) in enucleated pups. **B.** Bar graphs showing layer-specific comparison of  
 646 correlation connection maps of inhibitory inputs. Correlation was lower in L4 ( $p < 0.008$ , Cohen's  
 647  $d$ : 0.5) and higher in L5/6 and SPN (L5/6;  $p < 0.002$ , Cohen's  $d$ : -0.5, SPN;  $p < 0.0009$ , Cohen's  $d$ :  
 648 -0.5) in enucleated pups. **C.** CDFs show layer-specific comparison of E/I balance index, [(E-  
 649 I)/(E+I)], of mean charge and total charge. **D.** CDFs show layer-specific comparison of E/I balance  
 650 index of peak amplitude and total amplitude of postsynaptic currents. E/I balance indices of total  
 651 amplitude in L4 and SPNs were higher (L4:  $p < 0.05$ , Cohen's  $d$ : -0.7, SPN;  $p < 0.04$ , Cohen's  $d$ : -  
 652 0.7) in enucleated pups.

## 653 Discussion:

654 Our results show that complete retinal deprivation from birth crossmodally alters spontaneous  
 655 and sound-evoked activity as well as functional intracortical connectivity to the SPNs in the  
 656 developing ACX during the precritical period before the ear canals are open.

657           Bilateral enucleation at birth crossmodally alters activity and functional connectivity of the  
658 ACX in a variety of species (Bell et al., 2019; Dooley & Krubitzer, 2019; Karlen et al., 2006;  
659 Mezzera & Lopez-Bendito, 2016; Teichert & Bolz, 2018). However, these crossmodal changes  
660 are generally investigated in adults or in developing animals during the “classic critical period”,  
661 the brief time window in sensory development imposing heightened sensory influence (Barkat et  
662 al., 2011; Erzurumlu & Gaspar, 2012; Hubel & Wiesel, 1970; Kreile et al., 2011). Here we show  
663 that early retinal deprivation crossmodally alters activity and functional connectivity in the  
664 developing mouse ACX within the first postnatal week, even before the onset of the classic critical  
665 period (~P11 in rats, ~P12 in mice) (Barkat et al., 2011; de Villers-Sidani et al., 2007). Such  
666 immediate and short-term crossmodal cortical changes have been reported in the developing  
667 rodent somatosensory system using gene expression and anatomical techniques. For example,  
668 enucleation at birth in mice results in positional shift in developmentally regulated gene (e.g.,  
669 *ephrin A5*) expression and inter-neocortical projections at the somatosensory-visual border in only  
670 10 days (Dye et al., 2012). In rats enucleated at birth, a crossmodal expansion of the barrel fields  
671 is also observed within the somatosensory cortex at the end of the first postnatal week (Fetter-  
672 Pruneda et al., 2013) — days before the onset of active whisking (Grant et al., 2012). To our  
673 knowledge, our results are the first demonstration of experience-dependent early crossmodal  
674 functional changes within the auditory system, days before the ear canals are open. These  
675 changes may serve as a substrate for homeostatic sensory compensation in early development.

676           Our results show that enucleated animals show reduced inhibitory connections in the first  
677 postnatal week causing an imbalance between excitation and inhibition towards excitation, in  
678 particular for inputs from deep layers and that this imbalance is still present after ear opening.  
679 The observed imbalance towards excitation is consistent with our observation of increased  
680 spontaneous activity and increase spatial spread of activity correlations.

681 We observe a transient interlaminar circuit changes to SPNs. The overall inhibitory inputs  
682 from L5/6 and within the SPN were significantly compromised in enucleated pups at P8-9, which  
683 led to an imbalance between the excitatory and inhibitory inputs and a resultant increase in  
684 excitation. Such crossmodal changes in intralaminar cortical circuits has also been demonstrated  
685 in older mice after dark exposure (Meng et al., 2015, 2017). Visual deprivation has been shown  
686 to weaken intramodal synaptic inhibition within the visual cortex (Gabbott & Stewart, 1987;  
687 Morales et al., 2002). We here show that crossmodal manipulations also have the ability to change  
688 inhibitory circuits in the developing ACX.

689 We find that circuits from deep L5/6 neurons and from within SP are most impacted by  
690 retinal deprivation. Thus, we speculate that retinal input is relayed to ACX via these circuits. These  
691 crossmodal inputs to ACX could be intracortical and/or carried by thalamic afferents including  
692 afferents from visual thalamus, which innervates the developing ACX (Henschke et al., 2018).

693 Early crossmodal changes in the developing ACX included a persistent increase in  
694 amplitude and frequency of spontaneous events likely of cortical origin during the first and second  
695 postnatal weeks. Such instantaneous increase in spontaneous activity is also observed in  
696 thalamo-recipient L4 neurons in A1 after a brief visual deprivation (dark exposure for 7 days) in  
697 adult mice (Petrus et al., 2014). Additionally, dark exposure for a short period of time significantly  
698 enhances spontaneous raw local field potential (LFP) oscillations as well as  $\beta$  oscillations in A1  
699 L4 neurons in juvenile (P28) rats, suggesting crossmodal increase in excitability of A1 neurons  
700 and higher synchronization of activity within a widespread cortical area (Pan et al., 2018).  
701 Immediate changes in spontaneous activity is also observed within days of bilateral enucleation  
702 in the primary somatosensory cortex of newborn rats (Martinez-Mendez et al., 2019), which may  
703 mechanistically underlie the crossmodal barrel expansion as reported elsewhere (Fetter-Pruneda  
704 et al., 2013). Therefore, the observed increase in frequency and amplitude of spontaneous H-  
705 events could possibly underlie the crossmodal expansion of the ACX as observed after bilateral

706 enucleation (Kahn & Krubitzer, 2002). Additionally, increased spontaneous activity could enhance  
707 the excitability of the cortical neurons to underlie the enhanced crossmodal sound activation and  
708 perception later in life, as observed in adult animals after visual deprivation (Korte & Rauschecker,  
709 1993; Petrus et al., 2014; Rauschecker & Kniepert, 1994) and in congenitally blind individuals [for  
710 review see (Bell et al., 2019)].

711 In addition to intracortical changes, alteration in thalamo-cortical activity could also  
712 contribute to the observed changes. Crossmodal thalamo-cortical changes are observed after  
713 visual deprivation in the auditory pathway at older ages. For example, an increase in LFP  
714 oscillation power in the auditory thalamus (medial geniculate nucleus) is observed in juvenile  
715 (P28) rats after bilateral enucleation (Pan et al., 2018). Dark exposure results in strengthening of  
716 thalamocortical synapses to A1 L4 neurons in adult mice (Petrus et al., 2014). However, we  
717 observe only small changes in L-events suggesting that changes in auditory thalamocortical  
718 circuits after enucleation are likely to be very small. In addition to changes in ascending auditory  
719 pathway, the small transient changes in ACX L-events could also result from changes within the  
720 visual thalamus (lateral geniculate nucleus, LGN) that sends afferent inputs to the developing  
721 ACX (Henschke et al., 2018). LGN is activated after visual deprivation (Bhandari et al., 2022;  
722 Giasafaki et al., 2022), and experiences rewiring of cortico-thalamic projections after enucleation  
723 (Frangeul et al., 2016; Giasafaki et al., 2022; Grant et al., 2016). Together, we reason that the  
724 functional changes we observe are mostly due to changes in intracortical circuits.

725 Our results demonstrate that in addition to intramodal rewiring of SPN circuits after  
726 sensory deprivation (Meng et al., 2021; Mukherjee et al., 2021), compensatory crossmodal  
727 rearrangement of intra- and inter-laminar circuits are observed in the cortical SPNs before the  
728 onset of the classic critical period. This suggests that the earlier-born SPNs are the earliest cortical  
729 substrate for a wide range of early experience-dependent plasticity.

730           Identifying the developmental emergence of crossmodal changes and their underlying  
731 mechanisms is critically important to implement effective therapeutic measures to recover or  
732 restore early loss of sensory function in children. For example, in children with congenital or other  
733 forms of deafness, the earlier the cochlear implant is implemented, the better the chances of  
734 restoring hearing before it is taken over by other modalities (Hoff et al., 2019; Peixoto et al., 2013).  
735 Given the key role of SPNs in shaping the development of cortical layer 4 and beyond (Kanold et  
736 al., 2003; Kanold & Shatz, 2006), early transient crossmodal influences onto SPNs might have  
737 the potential to affect later development of other cortical areas even beyond the initial crossmodal  
738 effect. Thus, limiting or exploiting such early crossmodal interactions might be beneficial for  
739 therapeutic interventions.

## 740 References

- 741
- 742 Aerts, J., Nys, J., & Arckens, L. (2014). A highly reproducible and straightforward method to perform in  
743 vivo ocular enucleation in the mouse after eye opening. *J Vis Exp*(92), e51936.  
744 <https://doi.org/10.3791/51936>
- 745 Argandona, E. G., & Lafuente, J. V. (1996). Effects of dark-rearing on the vascularization of the  
746 developmental rat visual cortex. *Brain Res*, 732(1-2), 43-51. [https://doi.org/10.1016/0006-  
747 8993\(96\)00485-4](https://doi.org/10.1016/0006-8993(96)00485-4)
- 748 Babola, T. A., Li, S., Gribizis, A., Lee, B. J., Issa, J. B., Wang, H. C., Crair, M. C., & Bergles, D. E. (2018).  
749 Homeostatic Control of Spontaneous Activity in the Developing Auditory System. *Neuron*, 99(3),  
750 511-524 e515. <https://doi.org/10.1016/j.neuron.2018.07.004>
- 751 Ball, K., & Sekuler, R. (1982). A specific and enduring improvement in visual motion discrimination.  
752 *Science*, 218(4573), 697-698. <https://doi.org/10.1126/science.7134968>
- 753 Bansal, A., Singer, J. H., Hwang, B. J., Xu, W., Beaudet, A., & Feller, M. B. (2000). Mice lacking specific  
754 nicotinic acetylcholine receptor subunits exhibit dramatically altered spontaneous activity  
755 patterns and reveal a limited role for retinal waves in forming ON and OFF circuits in the inner  
756 retina. *J Neurosci*, 20(20), 7672-7681. <https://www.ncbi.nlm.nih.gov/pubmed/11027228>
- 757 Barkat, T. R., Polley, D. B., & Hensch, T. K. (2011). A critical period for auditory thalamocortical  
758 connectivity. *Nat Neurosci*, 14(9), 1189-1194. <https://doi.org/10.1038/nn.2882>
- 759 Bell, L., Wagels, L., Neuschaefer-Rube, C., Fels, J., Gur, R. E., & Konrad, K. (2019). The Cross-Modal Effects  
760 of Sensory Deprivation on Spatial and Temporal Processes in Vision and Audition: A Systematic  
761 Review on Behavioral and Neuroimaging Research since 2000. *Neural Plast*, 2019, 9603469.  
762 <https://doi.org/10.1155/2019/9603469>
- 763 Bhandari, A., Ward, T. W., Smith, J., & Van Hook, M. J. (2022). Structural and Functional Plasticity in the  
764 Dorsolateral Geniculate Nucleus of Mice following Bilateral Enucleation. *Neuroscience*, 488, 44-  
765 59. <https://doi.org/10.1016/j.neuroscience.2022.01.029>
- 766 Blankenship, A. G., & Feller, M. B. (2010). Mechanisms underlying spontaneous patterned activity in  
767 developing neural circuits. *Nat Rev Neurosci*, 11(1), 18-29. <https://doi.org/10.1038/nrn2759>
- 768 Blumberg, M. S., Marques, H. G., & Iida, F. (2013). Twitching in sensorimotor development from sleeping  
769 rats to robots. *Curr Biol*, 23(12), R532-537. <https://doi.org/10.1016/j.cub.2013.04.075>
- 770 Briner, A., De Roo, M., Dayer, A., Muller, D., Kiss, J. Z., & Vutskits, L. (2010). Bilateral whisker trimming  
771 during early postnatal life impairs dendritic spine development in the mouse somatosensory  
772 barrel cortex. *J Comp Neurol*, 518(10), 1711-1723. <https://doi.org/10.1002/cne.22297>
- 773 Butz, M., Worgotter, F., & van Ooyen, A. (2009). Activity-dependent structural plasticity. *Brain Res Rev*,  
774 60(2), 287-305. <https://doi.org/10.1016/j.brainresrev.2008.12.023>
- 775 Chang, M., & Kanold, P. O. (2021). Development of Auditory Cortex Circuits. *J Assoc Res Otolaryngol*,  
776 22(3), 237-259. <https://doi.org/10.1007/s10162-021-00794-3>
- 777 Chen, X. J., Rasch, M. J., Chen, G., Ye, C. Q., Wu, S., & Zhang, X. H. (2014). Binocular input coincidence  
778 mediates critical period plasticity in the mouse primary visual cortex. *J Neurosci*, 34(8), 2940-  
779 2955. <https://doi.org/10.1523/JNEUROSCI.2640-13.2014>
- 780 Cruikshank, S. J., Rose, H. J., & Metherate, R. (2002). Auditory thalamocortical synaptic transmission in  
781 vitro. *J Neurophysiol*, 87(1), 361-384.  
782 [http://www.ncbi.nlm.nih.gov/entrez/query.fcgi?cmd=Retrieve&db=PubMed&dopt=Citation&list  
783 uids=11784756](http://www.ncbi.nlm.nih.gov/entrez/query.fcgi?cmd=Retrieve&db=PubMed&dopt=Citation&listuids=11784756)
- 784 de Villers-Sidani, E., Chang, E. F., Bao, S., & Merzenich, M. M. (2007). Critical period window for spectral  
785 tuning defined in the primary auditory cortex (A1) in the rat. *J Neurosci*, 27(1), 180-189.  
786 <https://doi.org/10.1523/JNEUROSCI.3227-06.2007>

- 787 Deng, R., Kao, J. P. Y., & Kanold, P. O. (2021). Aberrant development of excitatory circuits to inhibitory  
788 neurons in the primary visual cortex after neonatal binocular enucleation. *Sci Rep*, 11(1), 3163.  
789 <https://doi.org/10.1038/s41598-021-82679-2>
- 790 Diao, Y., Chen, Y., Zhang, P., Cui, L., & Zhang, J. (2018). Molecular guidance cues in the development of  
791 visual pathway. *Protein Cell*, 9(11), 909-929. <https://doi.org/10.1007/s13238-017-0490-7>
- 792 Dooley, J. C., & Krubitzer, L. A. (2019). Alterations in cortical and thalamic connections of somatosensory  
793 cortex following early loss of vision. *J Comp Neurol*, 527(10), 1675-1688.  
794 <https://doi.org/10.1002/cne.24582>
- 795 Dye, C. A., Abbott, C. W., & Huffman, K. J. (2012). Bilateral enucleation alters gene expression and  
796 intraneocortical connections in the mouse. *Neural Dev*, 7, 5. <https://doi.org/10.1186/1749-8104-7-5>
- 797
- 798 Erzurumlu, R. S., & Gaspar, P. (2012). Development and critical period plasticity of the barrel cortex. *Eur*  
799 *J Neurosci*, 35(10), 1540-1553. <https://doi.org/10.1111/j.1460-9568.2012.08075.x>
- 800 Espinosa, J. S., & Stryker, M. P. (2012). Development and plasticity of the primary visual cortex. *Neuron*,  
801 75(2), 230-249. <https://doi.org/10.1016/j.neuron.2012.06.009>
- 802 Fetter-Pruneda, I., Geovannini-Acuna, H., Santiago, C., Ibarraran-Viniegra, A. S., Martinez-Martinez, E.,  
803 Sandoval-Velasco, M., Uribe-Figueroa, L., Padilla-Cortes, P., Mercado-Celis, G., & Gutierrez-  
804 Ospina, G. (2013). Shifts in developmental timing, and not increased levels of experience-  
805 dependent neuronal activity, promote barrel expansion in the primary somatosensory cortex of  
806 rats enucleated at birth. *PLoS One*, 8(1), e54940. <https://doi.org/10.1371/journal.pone.0054940>
- 807 Francis, N. A., Winkowski, D. E., Sheikhattar, A., Armengol, K., Babadi, B., & Kanold, P. O. (2018). Small  
808 Networks Encode Decision-Making in Primary Auditory Cortex. *Neuron*, 97(4), 885-897 e886.  
809 <https://doi.org/10.1016/j.neuron.2018.01.019>
- 810 Frangeul, L., Pouchelon, G., Telley, L., Lefort, S., Luscher, C., & Jabaudon, D. (2016). A cross-modal  
811 genetic framework for the development and plasticity of sensory pathways. *Nature*, 538(7623),  
812 96-98. <https://doi.org/10.1038/nature19770>
- 813 Friauf, E., McConnell, S. K., & Shatz, C. J. (1990). Functional synaptic circuits in the subplate during fetal  
814 and early postnatal development of cat visual cortex. *J Neurosci*, 10(8), 2601-2613.
- 815 Friauf, E., & Shatz, C. J. (1991). Changing patterns of synaptic input to subplate and cortical plate during  
816 development of visual cortex. *J Neurophysiol*, 66(6), 2059-2071.
- 817 Gabbott, P. L., & Stewart, M. G. (1987). Quantitative morphological effects of dark-rearing and light  
818 exposure on the synaptic connectivity of layer 4 in the rat visual cortex (area 17). *Exp Brain Res*,  
819 68(1), 103-114. <https://doi.org/10.1007/BF00255237>
- 820 Ghosh, A., Antonini, A., McConnell, S. K., & Shatz, C. J. (1990). Requirement for subplate neurons in the  
821 formation of thalamocortical connections. *Nature*, 347(6289), 179-181.
- 822 Ghosh, A., & Shatz, C. J. (1992). Involvement of subplate neurons in the formation of ocular dominance  
823 columns. *Science*, 255(5050), 1441-1443.
- 824 Ghosh, A., & Shatz, C. J. (1993). A role for subplate neurons in the patterning of connections from  
825 thalamus to neocortex. *Development*, 117(3), 1031-1047. [http://www.ncbi.nlm.nih.gov/cgi-  
826 bin/Entrez/referer?http://www.cob.org.uk/Development/117/03/dev9138.html](http://www.ncbi.nlm.nih.gov/cgi-bin/Entrez/referer?http://www.cob.org.uk/Development/117/03/dev9138.html)
- 827 Giasafaki, C., Grant, E., Hoerder-Suabedissen, A., Hayashi, S., Lee, S., & Molnar, Z. (2022). Cross-  
828 hierarchical plasticity of corticofugal projections to dLGN after neonatal monocular enucleation.  
829 *J Comp Neurol*, 530(7), 978-997. <https://doi.org/10.1002/cne.25304>
- 830 Grant, E., Hoerder-Suabedissen, A., & Molnar, Z. (2016). The Regulation of Corticofugal Fiber Targeting  
831 by Retinal Inputs. *Cereb Cortex*, 26(3), 1336-1348. <https://doi.org/10.1093/cercor/bhv315>
- 832 Grant, R. A., Mitchinson, B., & Prescott, T. J. (2012). The development of whisker control in rats in  
833 relation to locomotion. *Dev Psychobiol*, 54(2), 151-168. <https://doi.org/10.1002/dev.20591>

- 834 Hanganu-Opatz, I. L., Rowland, B. A., Bieler, M., & Sieben, K. (2015). Unraveling Cross-Modal  
835 Development in Animals: Neural Substrate, Functional Coding and Behavioral Readout.  
836 *Multisens Res*, 28(1-2), 33-69. <https://doi.org/10.1163/22134808-00002477>
- 837 Hensch, T. K., & Stryker, M. P. (2004). Columnar architecture sculpted by GABA circuits in developing cat  
838 visual cortex. *Science*, 303(5664), 1678-1681.  
839 [http://www.ncbi.nlm.nih.gov/entrez/query.fcgi?cmd=Retrieve&db=PubMed&dopt=Citation&list](http://www.ncbi.nlm.nih.gov/entrez/query.fcgi?cmd=Retrieve&db=PubMed&dopt=Citation&listuids=15017001)  
840 [uids=15017001](http://www.ncbi.nlm.nih.gov/entrez/query.fcgi?cmd=Retrieve&db=PubMed&dopt=Citation&listuids=15017001)
- 841 Henschke, J. U., Oelschlegel, A. M., Angenstein, F., Ohl, F. W., Goldschmidt, J., Kanold, P. O., & Budinger,  
842 E. (2018). Early sensory experience influences the development of multisensory thalamocortical  
843 and intracortical connections of primary sensory cortices. *Brain Struct Funct*, 223(3), 1165-1190.  
844 <https://doi.org/10.1007/s00429-017-1549-1>
- 845 Herrmann, K., Antonini, A., & Shatz, C. J. (1994). Ultrastructural evidence for synaptic interactions  
846 between thalamocortical axons and subplate neurons. *Eur J Neurosci*, 6(11), 1729-1742.  
847 <https://doi.org/10.1111/j.1460-9568.1994.tb00565.x>
- 848 Higashi, S., Molnar, Z., Kurotani, T., & Toyama, K. (2002). Prenatal development of neural excitation in  
849 rat thalamocortical projections studied by optical recording. *Neuroscience*, 115(4), 1231-1246.  
850 [https://doi.org/10.1016/s0306-4522\(02\)00418-9](https://doi.org/10.1016/s0306-4522(02)00418-9)
- 851 Hoff, S., Ryan, M., Thomas, D., Tournis, E., Kenny, H., Hajduk, J., & Young, N. M. (2019). Safety and  
852 Effectiveness of Cochlear Implantation of Young Children, Including Those With Complicating  
853 Conditions. *Otol Neurotol*, 40(4), 454-463. <https://doi.org/10.1097/MAO.0000000000002156>
- 854 Hubel, D. H., & Wiesel, T. N. (1970). The period of susceptibility to the physiological effects of unilateral  
855 eye closure in kittens. *J Physiol*, 206(2), 419-436.  
856 <https://doi.org/10.1113/jphysiol.1970.sp009022>
- 857 Hubener, M., & Bonhoeffer, T. (2014). Neuronal plasticity: beyond the critical period. *Cell*, 159(4), 727-  
858 737. <https://doi.org/10.1016/j.cell.2014.10.035>
- 859 Kahn, D. M., & Krubitzer, L. (2002). Massive cross-modal cortical plasticity and the emergence of a new  
860 cortical area in developmentally blind mammals. *Proc Natl Acad Sci U S A*, 99(17), 11429-11434.  
861 <https://doi.org/10.1073/pnas.162342799>
- 862 Kanold, P. O., Kara, P., Reid, R. C., & Shatz, C. J. (2003). Role of subplate neurons in functional maturation  
863 of visual cortical columns. *Science*, 301(5632), 521-525.  
864 <https://doi.org/10.1126/science.1084152>
- 865 Kanold, P. O., & Luhmann, H. J. (2010). The subplate and early cortical circuits. *Annu Rev Neurosci*, 33,  
866 23-48. <https://doi.org/10.1146/annurev-neuro-060909-153244>
- 867 Kanold, P. O., & Shatz, C. J. (2006). Subplate neurons regulate maturation of cortical inhibition and  
868 outcome of ocular dominance plasticity. *Neuron*, 51(5), 627-638.  
869 <https://doi.org/10.1016/j.neuron.2006.07.008>
- 870 Kao, J. P. Y. (2006). Caged molecules: principles and practical considerations. In C. Gerfen, A. Holmes, M.  
871 Rogawski, D. Sibley, P. Skolnick, & S. Wray (Eds.), *Current protocols in neuroscience* (Vol. Unit  
872 6.20). Wiley.
- 873 Karlen, S. J., Kahn, D. M., & Krubitzer, L. (2006). Early blindness results in abnormal corticocortical and  
874 thalamocortical connections. *Neuroscience*, 142(3), 843-858.  
875 <https://doi.org/10.1016/j.neuroscience.2006.06.055>
- 876 Kayser, C., & Logothetis, N. K. (2007). Do early sensory cortices integrate cross-modal information? *Brain*  
877 *Struct Funct*, 212(2), 121-132. <https://doi.org/10.1007/s00429-007-0154-0>
- 878 Kolb, B., & Gibb, R. (2011). Brain plasticity and behaviour in the developing brain. *J Can Acad Child*  
879 *Adolesc Psychiatry*, 20(4), 265-276. <https://www.ncbi.nlm.nih.gov/pubmed/22114608>



- 880 Korte, M., & Rauschecker, J. P. (1993). Auditory spatial tuning of cortical neurons is sharpened in cats  
881 with early blindness. *J Neurophysiol*, *70*(4), 1717-1721.  
882 <https://doi.org/10.1152/jn.1993.70.4.1717>
- 883 Kral, A., & Eggermont, J. J. (2007). What's to lose and what's to learn: development under auditory  
884 deprivation, cochlear implants and limits of cortical plasticity. *Brain Res Rev*, *56*(1), 259-269.  
885 <https://doi.org/10.1016/j.brainresrev.2007.07.021>
- 886 Kral, A., Tillein, J., Heid, S., Hartmann, R., & Klinke, R. (2005). Postnatal cortical development in  
887 congenital auditory deprivation. *Cereb Cortex*, *15*(5), 552-562.  
888 <https://doi.org/10.1093/cercor/bhh156>
- 889 Kreile, A. K., Bonhoeffer, T., & Hubener, M. (2011). Altered visual experience induces instructive changes  
890 of orientation preference in mouse visual cortex. *J Neurosci*, *31*(39), 13911-13920.  
891 <https://doi.org/10.1523/JNEUROSCI.2143-11.2011>
- 892 Larsen, D. D., Luu, J. D., Burns, M. E., & Krubitzer, L. (2009). What are the Effects of Severe Visual  
893 Impairment on the Cortical Organization and Connectivity of Primary Visual Cortex? *Front*  
894 *Neuroanat*, *3*, 30. <https://doi.org/10.3389/neuro.05.030.2009>
- 895 Liu, J., Whiteway, M. R., Sheikhattar, A., Butts, D. A., Babadi, B., & Kanold, P. O. (2019). Parallel  
896 processing of sound dynamics across mouse auditory cortex via spatially patterned thalamic  
897 inputs and distinct areal intracortical circuits. *Cell reports*, *27*(3), 872-885. e877.
- 898 Liu, J., Whiteway, M. R., Sheikhattar, A., Butts, D. A., Babadi, B., & Kanold, P. O. (2019). Parallel  
899 Processing of Sound Dynamics across Mouse Auditory Cortex via Spatially Patterned Thalamic  
900 Inputs and Distinct Areal Intracortical Circuits. *Cell Rep*, *27*(3), 872-885 e877.  
901 <https://doi.org/10.1016/j.celrep.2019.03.069>
- 902 Lorenz, K. (1935). Der Kumpan in der Umwelt des Vogels. *Journal für Ornithologie*, *83*(3), 289-413.  
903 <https://doi.org/10.1007/BF01905572>
- 904 Maccione, A., Hennig, M. H., Gandolfo, M., Muthmann, O., van Coppenhagen, J., Eglén, S. J., Berdondini,  
905 L., & Sernagor, E. (2014). Following the ontogeny of retinal waves: pan-retinal recordings of  
906 population dynamics in the neonatal mouse. *J Physiol*, *592*(7), 1545-1563.  
907 <https://doi.org/10.1113/jphysiol.2013.262840>
- 908 Majewska, A., & Sur, M. (2003). Motility of dendritic spines in visual cortex in vivo: changes during the  
909 critical period and effects of visual deprivation. *Proc Natl Acad Sci U S A*, *100*(26), 16024-16029.  
910 <https://doi.org/10.1073/pnas.2636949100>
- 911 Martínez-Mendez, R., Pérez-Torres, D., Gómez-Chavarín, M., Padilla-Cortés, P., Fiordelisio, T., &  
912 Gutiérrez-Ospina, G. (2019). Bilateral enucleation at birth modifies calcium spike amplitude, but  
913 not frequency, in neurons of the somatosensory thalamus and cortex: Implications for  
914 developmental cross-modal plasticity. *IBRO Rep*, *7*, 108-116.  
915 <https://doi.org/10.1016/j.ibror.2019.11.003>
- 916 Martini, F. J., Guillamon-Vivancos, T., Moreno-Juan, V., Valdeolmillos, M., & López-Bendito, G. (2021).  
917 Spontaneous activity in developing thalamic and cortical sensory networks. *Neuron*, *109*(16),  
918 2519-2534. <https://doi.org/10.1016/j.neuron.2021.06.026>
- 919 Meng, X., Kao, J. P., & Kanold, P. O. (2014). Differential signaling to subplate neurons by spatially specific  
920 silent synapses in developing auditory cortex. *J Neurosci*, *34*(26), 8855-8864.  
921 <https://doi.org/10.1523/JNEUROSCI.0233-14.2014>
- 922 Meng, X., Kao, J. P., Lee, H. K., & Kanold, P. O. (2015). Visual Deprivation Causes Refinement of  
923 Intracortical Circuits in the Auditory Cortex. *Cell Rep*, *12*(6), 955-964.  
924 <https://doi.org/10.1016/j.celrep.2015.07.018>
- 925 Meng, X., Kao, J. P., Lee, H. K., & Kanold, P. O. (2017). Intracortical Circuits in Thalamorecipient Layers of  
926 Auditory Cortex Refine after Visual Deprivation. *eNeuro*, *4*(2).  
927 <https://doi.org/10.1523/ENEURO.0092-17.2017>

- 928 Meng, X., Mukherjee, D., Kao, J. P. Y., & Kanold, P. O. (2021). Early peripheral activity alters nascent  
929 subplate circuits in the auditory cortex. *Sci Adv*, 7(7). <https://doi.org/10.1126/sciadv.abc9155>
- 930 Mezzera, C., & Lopez-Bendito, G. (2016). Cross-modal plasticity in sensory deprived animal models: From  
931 the thalamocortical development point of view. *J Chem Neuroanat*, 75(Pt A), 32-40.  
932 <https://doi.org/10.1016/j.jchemneu.2015.09.005>
- 933 Molnar, Z., Kurotani, T., Higashi, S., Yamamoto, N., & Toyama, K. (2003). Development of functional  
934 thalamocortical synapses studied with current source-density analysis in whole forebrain slices  
935 in the rat. *Brain Res Bull*, 60(4), 355-371.  
936 [http://www.ncbi.nlm.nih.gov/entrez/query.fcgi?cmd=Retrieve&db=PubMed&dopt=Citation&list](http://www.ncbi.nlm.nih.gov/entrez/query.fcgi?cmd=Retrieve&db=PubMed&dopt=Citation&listuids=12781324)  
937 [uids=12781324](http://www.ncbi.nlm.nih.gov/entrez/query.fcgi?cmd=Retrieve&db=PubMed&dopt=Citation&listuids=12781324)
- 938 Molnar, Z., Luhmann, H. J., & Kanold, P. O. (2020). Transient cortical circuits match spontaneous and  
939 sensory-driven activity during development. *Science*, 370(6514).  
940 <https://doi.org/10.1126/science.abb2153>
- 941 Morales, B., Choi, S. Y., & Kirkwood, A. (2002). Dark rearing alters the development of GABAergic  
942 transmission in visual cortex. *J Neurosci*, 22(18), 8084-8090.  
943 <https://www.ncbi.nlm.nih.gov/pubmed/12223562>
- 944 Mukherjee, D., & Kanold, P. O. (2022). Changing subplate circuits: Early activity dependent circuit  
945 plasticity. *Front Cell Neurosci*, 16, 1067365. <https://doi.org/10.3389/fncel.2022.1067365>
- 946 Mukherjee, D., Meng, X., Kao, J. P. Y., & Kanold, P. O. (2021). Impaired Hearing and Altered Subplate  
947 Circuits During the First and Second Postnatal Weeks of Otoferlin-Deficient Mice. *Cereb Cortex*.  
948 <https://doi.org/10.1093/cercor/bhab383>
- 949 Muralidharan, S., Dirda, N. D., Katz, E. J., Tang, C. M., Bandyopadhyay, S., Kanold, P. O., & Kao, J. P.  
950 (2016). Ncm, a Photolabile Group for Preparation of Caged Molecules: Synthesis and Biological  
951 Application. *PLoS One*, 11(10), e0163937. <https://doi.org/10.1371/journal.pone.0163937>
- 952 Nagode, D. A., Meng, X., Winkowski, D. E., Smith, E., Khan-Tareen, H., Kareddy, V., Kao, J. P. Y., & Kanold,  
953 P. O. (2017). Abnormal Development of the Earliest Cortical Circuits in a Mouse Model of Autism  
954 Spectrum Disorder. *Cell Rep*, 18(5), 1100-1108. <https://doi.org/10.1016/j.celrep.2017.01.006>
- 955 Nicolini, C., & Fahnstock, M. (2018). The valproic acid-induced rodent model of autism. *Exp Neurol*,  
956 299(Pt A), 217-227. <https://doi.org/10.1016/j.expneurol.2017.04.017>
- 957 Pan, P., Zhou, Y., Fang, F., Zhang, G., & Ji, Y. (2018). Visual deprivation modifies oscillatory activity in  
958 visual and auditory centers. *Anim Cells Syst (Seoul)*, 22(3), 149-156.  
959 <https://doi.org/10.1080/19768354.2018.1474801>
- 960 Peixoto, M. C., Spratley, J., Oliveira, G., Martins, J., Bastos, J., & Ribeiro, C. (2013). Effectiveness of  
961 cochlear implants in children: long term results. *Int J Pediatr Otorhinolaryngol*, 77(4), 462-468.  
962 <https://doi.org/10.1016/j.ijporl.2012.12.005>
- 963 Petrus, E., Isaiah, A., Jones, A. P., Li, D., Wang, H., Lee, H. K., & Kanold, P. O. (2014). Crossmodal  
964 induction of thalamocortical potentiation leads to enhanced information processing in the  
965 auditory cortex. *Neuron*, 81(3), 664-673. <https://doi.org/10.1016/j.neuron.2013.11.023>
- 966 Raggio, M. W., & Schreiner, C. E. (1999). Neuronal responses in cat primary auditory cortex to electrical  
967 cochlear stimulation. III. Activation patterns in short- and long-term deafness. *J Neurophysiol*,  
968 82(6), 3506-3526. <https://doi.org/10.1152/jn.1999.82.6.3506>
- 969 Ramamurthy, D. L., & Krubitzer, L. A. (2018). Neural Coding of Whisker-Mediated Touch in Primary  
970 Somatosensory Cortex Is Altered Following Early Blindness. *J Neurosci*, 38(27), 6172-6189.  
971 <https://doi.org/10.1523/JNEUROSCI.0066-18.2018>
- 972 Rauschecker, J. P., & Knipert, U. (1994). Auditory localization behaviour in visually deprived cats. *Eur J*  
973 *Neurosci*, 6(1), 149-160. <https://doi.org/10.1111/j.1460-9568.1994.tb00256.x>

- 974 Reh, R. K., Dias, B. G., Nelson, C. A., 3rd, Kaufer, D., Werker, J. F., Kolb, B., Levine, J. D., & Hensch, T. K.  
975 (2020). Critical period regulation across multiple timescales. *Proc Natl Acad Sci U S A*, *117*(38),  
976 23242-23251. <https://doi.org/10.1073/pnas.1820836117>
- 977 Sato, M., & Stryker, M. P. (2008). Distinctive features of adult ocular dominance plasticity. *J Neurosci*,  
978 *28*(41), 10278-10286. <https://doi.org/10.1523/JNEUROSCI.2451-08.2008>
- 979 Sawtell, N. B., Frenkel, M. Y., Philpot, B. D., Nakazawa, K., Tonegawa, S., & Bear, M. F. (2003). NMDA  
980 receptor-dependent ocular dominance plasticity in adult visual cortex. *Neuron*, *38*(6), 977-985.  
981 [https://doi.org/10.1016/s0896-6273\(03\)00323-4](https://doi.org/10.1016/s0896-6273(03)00323-4)
- 982 Sheikh, A., Meng, X., Liu, J., Mikhailova, A., Kao, J. P. Y., McQuillen, P. S., & Kanold, P. O. (2019). Neonatal  
983 Hypoxia-Ischemia Causes Functional Circuit Changes in Subplate Neurons. *Cereb Cortex*, *29*(2),  
984 765-776. <https://doi.org/10.1093/cercor/bhx358>
- 985 Siegel, F., Heimel, J. A., Peters, J., & Lohmann, C. (2012). Peripheral and central inputs shape network  
986 dynamics in the developing visual cortex in vivo. *Curr Biol*, *22*(3), 253-258.  
987 <https://doi.org/10.1016/j.cub.2011.12.026>
- 988 Skaliora, I. (2002). Experience-dependent plasticity in the developing brain. *International Congress*  
989 *Series*, *1241*, 313-320. [https://doi.org/https://doi.org/10.1016/S0531-5131\(02\)00616-7](https://doi.org/https://doi.org/10.1016/S0531-5131(02)00616-7)
- 990 Striem-Amit, E., Bubic, A., & Amedi, A. (2012). Neurophysiological Mechanisms Underlying Plastic  
991 Changes and Rehabilitation following Sensory Loss in Blindness and Deafness. In M. M. Murray  
992 & M. T. Wallace (Eds.), *The Neural Bases of Multisensory Processes*.  
993 <https://www.ncbi.nlm.nih.gov/pubmed/22593863>
- 994 Suter, B. A., O'Connor, T., Iyer, V., Petreanu, L. T., Hooks, B. M., Kiritani, T., Svoboda, K., & Shepherd, G.  
995 M. (2010). Ephus: multipurpose data acquisition software for neuroscience experiments. *Front*  
996 *Neural Circuits*, *4*, 100. <https://doi.org/10.3389/fncir.2010.00100>
- 997 Tan, L., Ringach, D. L., Zipursky, S. L., & Trachtenberg, J. T. (2021). Vision is required for the formation of  
998 binocular neurons prior to the classical critical period. *Curr Biol*.  
999 <https://doi.org/10.1016/j.cub.2021.07.053>
- 1000 Teichert, M., & Bolz, J. (2018). How Senses Work Together: Cross-Modal Interactions between Primary  
1001 Sensory Cortices. *Neural Plast*, *2018*, 5380921. <https://doi.org/10.1155/2018/5380921>
- 1002 Tiriac, A., Smith, B. E., & Feller, M. B. (2018). Light Prior to Eye Opening Promotes Retinal Waves and  
1003 Eye-Specific Segregation. *Neuron*, *100*(5), 1059-1065 e1054.  
1004 <https://doi.org/10.1016/j.neuron.2018.10.011>
- 1005 Tolner, E. A., Sheikh, A., Yukin, A. Y., Kaila, K., & Kanold, P. O. (2012). Subplate neurons promote spindle  
1006 bursts and thalamocortical patterning in the neonatal rat somatosensory cortex. *J Neurosci*,  
1007 *32*(2), 692-702. <https://doi.org/10.1523/JNEUROSCI.1538-11.2012>
- 1008 Viswanathan, S., Sheikh, A., Looger, L. L., & Kanold, P. O. (2017). Molecularly Defined Subplate Neurons  
1009 Project Both to Thalamocortical Recipient Layers and Thalamus. *Cereb Cortex*, *27*(10), 4759-  
1010 4768. <https://doi.org/10.1093/cercor/bhw271>
- 1011 Wang, H. C., & Bergles, D. E. (2015). Spontaneous activity in the developing auditory system. *Cell Tissue*  
1012 *Res*, *361*(1), 65-75. <https://doi.org/10.1007/s00441-014-2007-5>
- 1013 Webber, A., & Raz, Y. (2006). Axon guidance cues in auditory development. *Anat Rec A Discov Mol Cell*  
1014 *Evol Biol*, *288*(4), 390-396. <https://doi.org/10.1002/ar.a.20299>
- 1015 Weliky, M., & Katz, L. C. (1999). Correlational structure of spontaneous neuronal activity in the  
1016 developing lateral geniculate nucleus in vivo. *Science*, *285*(5427), 599-604.  
1017 <https://doi.org/10.1126/science.285.5427.599>
- 1018 Wess, J. M., Isaiah, A., Watkins, P. V., & Kanold, P. O. (2017). Subplate neurons are the first cortical  
1019 neurons to respond to sensory stimuli. *Proc Natl Acad Sci U S A*, *114*(47), 12602-12607.  
1020 <https://doi.org/10.1073/pnas.1710793114>

- 1021 Zhao, C., Kao, J. P., & Kanold, P. O. (2009). Functional excitatory microcircuits in neonatal cortex connect  
1022 thalamus and layer 4. *J Neurosci*, *29*(49), 15479-15488.  
1023 <https://doi.org/10.1523/JNEUROSCI.4471-09.2009>
- 1024 Zhao, Y. J., Yu, T. T., Zhang, C., Li, Z., Luo, Q. M., Xu, T. H., & Zhu, D. (2018). Skull optical clearing window  
1025 for in vivo imaging of the mouse cortex at synaptic resolution. *Light Sci Appl*, *7*, 17153.  
1026 <https://doi.org/10.1038/lsa.2017.153>
